1           **Outer Membrane Vesicles from the gut microbiome contribute to tumor**  
2                           **immunity by eliciting cross-reactive T cells**

3  
4 M. Tomasi<sup>1#</sup>, E. Caproni<sup>1#</sup>, M. Benedet<sup>1,2#</sup>, I. Zanella<sup>1</sup>, S. Giorgetta<sup>1</sup>, M. Dalsass<sup>1</sup>, E. König<sup>1</sup>, A.  
5 Gagliardi<sup>2</sup>, L. Fantappiè<sup>2</sup>, A. Berti<sup>1</sup>, S. Tamburini<sup>1</sup>, L. Croia<sup>1</sup>, G. Di Lascio<sup>1</sup>, E. Bellini<sup>2</sup>, S.  
6 Valensin<sup>2</sup>, G. Licata<sup>4,5</sup>, G. Sebastiani<sup>4,5</sup>, F. Dotta<sup>4,5,6</sup>, F. Armanini<sup>1</sup>, F. Cumbo<sup>1</sup>, F. Asnicar<sup>1</sup>, A.  
7 Blanco-Míguez<sup>1</sup>, E. Ruggiero<sup>7</sup>, N. Segata<sup>1</sup>, G. Grandi<sup>1\*</sup> and A. Grandi<sup>2,3\*</sup>

8 **Affiliations:**

9 <sup>1</sup> *CIBIO Department, University of Trento, Trento, Italy*

10 <sup>2</sup> *Toscana Life Sciences Foundation, Siena, Italy*

11 <sup>3</sup> *BiOMViS Srl, Siena, Italy*

12 <sup>4</sup> *Diabetes Unit, Department of Medicine, Surgery and Neurosciences, University of Siena, Siena,*  
13 *Italy*

14 <sup>5</sup> *Fondazione Umberto Di Mario, c/o Toscana Life Sciences Foundation, Siena, Italy*

15 <sup>6</sup> *Tuscany Centre for Precision Medicine (CReMeP), Siena, Italy*

16 <sup>7</sup> *IRCCS Ospedale San Raffaele, Experimental Hematology Unit, Milan, Italy.*

17

18 \* Corresponding authors:

19 Guido Grandi, Professor of Microbiology and Clinical Microbiology, University of Trento,  
20 Trento, Italy: [guido.grandi@unitn.it](mailto:guido.grandi@unitn.it)

21 Alberto Grandi, PhD, Toscana Life Sciences Foundation, Siena, Italy:  
22 [a.grandi@toscanalifesciences.org](mailto:a.grandi@toscanalifesciences.org)

23

24 # These authors equally contributed to this work

25

26 **Abstract**

27 The gut microbiome plays a key role in cancer immunity. One proposed mechanism is through the  
28 elicitation of T cells, which incidentally recognize neo-epitopes arising from cancer mutations  
29 (“molecular mimicry (MM)” hypothesis). To support MM, *Escherichia coli* Nissle was engineered  
30 with the SIINFEKL epitope (OVA) and orally administered to C57BL/6 mice. The treatment  
31 elicited OVA-specific CD8<sup>+</sup> T cells in the *lamina propria* and inhibited the growth of OVA-  
32 B16F10 tumors. Importantly, the administration of Outer Membrane Vesicles (OMVs) engineered  
33 with different T cell epitopes elicited epitope-specific T cells and inhibited tumor growth.  
34 Microbiome shotgun sequencing and TCR sequencing provided evidence that cross-reacting T  
35 cells were induced at the mucosal level and subsequently reached the tumor site. Overall, our data  
36 support the role of MM in tumor immunity, assign a new role to OMVs and pave the way to new  
37 probiotics/OMV-based anti-cancer immunotherapies.

## 38 Introduction

39 The gut microbiome plays a fundamental role in cancer immunity and in determining the efficacy  
40 of cancer immunotherapy (Zitvogel et al., 2016). A recent epidemiological study has shown that  
41 antibiotic-associated dysbiosis can enhance the frequency of certain cancers, including lung,  
42 prostate and bladder cancers (Zitvogel et al., 2016, 2018). Furthermore, it was shown that C57BL/6  
43 germ-free or microbiome-depleted mice respond poorly to PD-1/PD-L1 therapy, while the anti-  
44 tumor activity of checkpoint inhibitors is potentiated when *Bifidobacterium* species are  
45 administered by oral gavage after tumor challenge (Sivan et al., 2015). Moreover, transplantation  
46 of fecal microbiome from patients responding to PD-L1 therapy, but not from non-responders,  
47 improves the efficacy of checkpoint inhibitors both in animal models and in melanoma patients  
48 (Davar et al., 2021; Routy et al., 2018a; Zitvogel et al., 2018). Finally, retrospective analyses in  
49 human patients under PD-1/PD-L1 therapy show the deleterious effect of antibiotics administered  
50 during the monoclonal antibody treatment (Zitvogel et al., 2016).

51 The mechanisms through which the gut microbiome influences cancer immunity are poorly  
52 defined. Three non-mutually exclusive mechanisms have been proposed. First, the gut microbiome  
53 has been shown to release metabolites, such as polyamine, vitamin B16 and short-chain fatty acids,  
54 which mediate systemic effect on the host immunity (Pietrocola et al., 2016). A second mechanism  
55 envisages a long distance adjuvant effect, which the microbiome exerts by releasing products and  
56 cytokines (Cook et al., 2020; Daillère et al., 2016; Sivan et al., 2015; Vétizou et al., 2015; Zitvogel  
57 et al., 2016). The third mechanism assumes that gut microbiome antigens are continuously  
58 processed by resident DCs, which in turn induce epitope-specific T cells. This T cell population  
59 mainly resides in the intestinal epithelium (intraepithelial lymphocytes (IELs)) and in the *lamina*  
60 *propria*, but can eventually disseminate systemically and reach organs and tumors (Routy et al.,  
61 2018a). Considering the abundance and diversity of microbial immunogenic epitopes, it is  
62 conceivable to believe that some of them induce T cells capable of recognizing homologous neo-  
63 epitopes arising from cancer mutations (“molecular mimicry (MM)” hypothesis). The MM  
64 hypothesis is particularly attractive since it would assign a previously unpredicted specificity to  
65 the anti-tumor activity of the gut microbiome.

66 The experimental evidence supporting the role of cross-reactive epitopes is still limited. It  
67 has been shown that the rare (<2%) long term (>10 years) survivors of pancreatic cancer carry  
68 infiltrating cytotoxic T cells specific for a MUC16 neo-epitope, which cross-react with pathogen-

69 associated epitopes (Balachandran et al., 2017). Moreover, bioinformatics analysis of the gut  
70 microbiome has revealed the existence of several microbiome antigens with high homology to  
71 known immunogenic T cell epitopes of bacterial, viral, and allergic antigens. This has led to  
72 propose the existence of microbiome “tolerogenic” and “inflammatory” epitopes which can  
73 dampen or increase the immunogenicity toward the homologous antigen-specific T cell epitopes  
74 (Bresciani et al., 2016; Pro et al., 2018). More recently, it has been proposed that mimic peptides  
75 from commensal bacteria can promote inflammatory cardiomyopathy in genetically susceptible  
76 individuals, leading to myocarditis and lethal heart disease (Gil-Cruz et al., 2019). Moreover,  
77 *Bifidobacterium breve* was shown to carry a T cell epitope, which cross-reacts with a model neo-  
78 antigen present in B16.SIY melanoma cell line and that the presence of *B. breve* in the mouse  
79 intestine reduced the growth of B16.SIY tumors in C57BL/6 mice (Bessell et al., 2020). Finally,  
80 mice bearing the tail length tape measure protein (TMP) found in the genome of a *Enterococcus*  
81 *hirae* bacteriophage mounted a TMP-specific CD8<sup>+</sup> T cell response, which improved PD-1  
82 immunotherapy (Fluckiger et al., 2020).

83 In an attempt to directly demonstrate that MM can influence cancer immunity, one of our  
84 strategies is to artificially introduce cancer-specific epitopes in commensal bacteria and see  
85 whether the presence of the engineered bacteria in the mouse intestine could induce epitope-  
86 specific T cell responses and could influence the development of tumors expressing such epitopes  
87 (Figure 1A).

88

## 89 **Results**

### 90 ***Oral administration of EcN engineered with a cancer epitope elicit cancer-specific T cells and*** 91 ***inhibits tumor growth***

92 The human probiotic *E. coli* Nissle 1917 (Lasaro et al., 2014; Sonnenborn, 2016) was  
93 engineered by fusing the SIINFELK epitope (OVA), a MHC class I immunodominant peptide  
94 from chicken ovalbumin, to the C-terminus of the outer membrane-associated Braun’s lipoprotein  
95 (Lpp) (Li et al., 2014). The manipulation of the EcN chromosome was carried out using a variation  
96 of the previously described CRISPR/Cas9 protocols (Qi et al., 2013; Zerbini et al., 2017), which  
97 allowed the in-frame insertion of the OVA sequence just upstream from the *lpp* stop codon (Figure  
98 S1). The expression of the Lpp-OVA fusion in EcN (EcN(*lpp-OVA*)) was confirmed by Western  
99 Blot analysis of total cell extract, using anti-OVA peptide antibodies (Figure S2).

100 Next, we assessed whether the oral administration of EcN(*lpp-OVA*) could elicit OVA-  
101 specific CD8<sup>+</sup> T cells in the *lamina propria*. To this end, EcN(*lpp-OVA*) (10<sup>9</sup> CFUs) was given by  
102 oral gavage to C57BL/6 mice three times at days 0, 3 and 6. One week after the last gavage mice  
103 were sacrificed and the presence of OVA-specific T cells in the *lamina propria* of small intestine  
104 was analyzed by flow cytometry (Figure 1B). As shown in Figure 1C the administration of  
105 EcN(*lpp-OVA*) elicited a significant fraction of OVA-specific CD8<sup>+</sup> T cells in all treated mice (1.5-  
106 2.0% of total CD8<sup>+</sup> T cells).

107 We then asked the question as to whether the administration of EcN(*lpp-OVA*) to C57BL/6  
108 mice could influence the development of tumors when syngeneic OVA-B16F10 cells were injected  
109 subcutaneously. Mice (8 animals/group) were given either EcN or EcN(*lpp-OVA*) at days 0, 3 and  
110 6 and one week after the last gavage all animals were challenged with 2.8×10<sup>5</sup> OVA-B16F10 cells.  
111 Three additional gavages were administered, the first one the day after the challenge, and the other  
112 two at one-week intervals (Figure 1D). As shown in Figure 1E, the administration of EcN(*lpp-*  
113 *OVA*) delayed tumor development with statistical significance (P=0.0079).

#### 114 ***Oral administration of OMVs from E.coli strains engineered with different CD8<sup>+</sup> epitopes*** 115 ***induces epitope-specific T cell responses and inhibits tumor growth***

116 Like all Gram-negative bacteria, EcN releases OMVs and since Lpp is a membrane-  
117 associated protein, Lpp-OVA fusion is expected to accumulate in the vesicular compartment.  
118 Therefore, the elicitation of the OVA-specific T cells observed after the oral administration of  
119 EcN(*lpp-OVA*) might be favored by the release of Lpp-OVA-decorated OMVs in the gut (Lpp-  
120 OVA-OMV<sub>EcN</sub>). Thanks to their small size (30 - 300 nm in diameter), these vesicles should be  
121 efficiently taken up by mucosal APCs, thus promoting the local elicitation of OVA-specific T cells  
122 responses. Moreover, OMVs can cross the intestinal epithelium and reach the bloodstream, thus  
123 potentially eliciting T cells in other secondary lymphoid organs (Jones et al., 2020; Tulkens et al.,  
124 2020).

125 To test the possible contribution of microbiome-released OMVs in anti-tumor immunity,  
126 we first verified the production of OMVs by EcN(*lpp-OVA*) and the presence of the Lpp-OVA  
127 fusion protein in the vesicular compartment. EcN(*lpp-OVA*) was grown in liquid culture and at the  
128 end of the exponential growth the culture supernatant was subjected to ultracentrifugation and the  
129 pellet analyzed by SDS-PAGE. As shown in Figure S2, EcN(*lpp-OVA*) released OMVs, which  
130 carried a protein species of 10 kDa recognized by antibodies specific for the OVA peptide.

131 Lpp-OVA-OMV<sub>SEcN</sub> were then purified from EcN(*lpp-OVA*) grown in a bioreactor and  
132 orally administered to C57BL/6 mice following the schedule reported in Figure 2A. One week  
133 after the last gavage, the animals were sacrificed and the presence of OVA-specific CD8<sup>+</sup> T cells  
134 in the *lamina propria* was analyzed. As shown in Figure 2B, 4 to 6% of all recovered CD8<sup>+</sup> T cells  
135 were OVA-specific.

136 Next, we asked the question as to whether Lpp-OVA-OMV<sub>SEcN</sub> could protect C57BL/6  
137 mice from the challenge with OVA-B16F10 cells. The vesicles were administered five times by  
138 oral gavage following the schedule reported in Figure 2G and tumor growth was followed for 22  
139 days after challenging mice with tumor cells one week after the third oral gavage. As shown in  
140 Figure 2H, mice receiving Lpp-OVA-OMV<sub>SEcN</sub> showed a substantial reduction in tumor growth  
141 when compared to mice that received “empty” OMVs (OMV<sub>SEcN</sub>) (P=0.0009).

142 We also investigated whether the tumor inhibitory activity of OMVs carrying the OVA  
143 CD8<sup>+</sup> T cell epitope was restricted to vesicles released by EcN or rather vesicles from other *E. coli*  
144 strains could exert a similar function. To address this question, we fused the OVA epitope at the  
145 C-terminus of Lpp in the hyper-vesiculating *E. coli* BL21(DE3) $\Delta ompA$  strain (Fantappiè et al.,  
146 2014). The OMVs expressing the Lpp-OVA fusion (Figure S2) were purified from *E. coli*  
147 BL21(DE3) $\Delta ompA$ (*lpp-OVA*) culture and administered by oral gavage to C57BL/6 mice following  
148 the schedule previously described. As shown in Figure 2C, Lpp-OVA-OMVs $\Delta ompA$  elicited OVA-  
149 specific CD8<sup>+</sup> T cells in the *lamina propria* and protected mice from OVA-B16F10 challenge to  
150 an extent similar to what observed with Lpp-OVA-OMV<sub>SEcN</sub> (P=0.0111) (Figure 2B).

151 Finally, we tested whether orally administered OMVs decorated with CD8<sup>+</sup> T cell epitopes  
152 other than OVA could elicit epitope-specific T cells. To this aim, *E. coli* BL21(DE3) $\Delta ompA$  was  
153 engineered with two other epitopes, the AH1 peptide (SPSYVYHQF), derived from the gp70  
154 envelope protein of the CT26 murine colon carcinoma cell line (Huang et al., 1996) and the SV40  
155 epitope IV T antigen peptide VVYDFLKL, efficiently presented by MHC I molecules in C57BL/6  
156 mice (Degl’Innocenti et al., 2005; Mylin et al., 2000). To drive the expression of the epitopes in  
157 the OMVs, two plasmids were generated, pET-MBP-AH1 and pET-FhuD2-SV40. pET-MBP-  
158 AH1 encodes the AH1 peptide fused to the C-terminus of Maltose Binding Protein (MBP), while  
159 pET-FhuD2-SV40 expresses the SV40 peptide fused to the C-terminus of FhuD2 (Irene et al.,  
160 2019). MBP-AH1-OMVs $\Delta ompA$  and FhuD2-SV40-OMVs $\Delta ompA$  were purified from *E. coli*  
161 BL21(DE3) $\Delta ompA$ (pET-MBP-AH1) and *E. coli* BL21(DE3) $\Delta ompA$ (pET-FhuD2-SV40),

162 respectively, and given three times, three days apart, by oral gavages to BALB/c and C57BL/6  
163 mice, respectively (Figure 2A). One week after the last gavage, epitope-specific T cells were  
164 analyzed in the *lamina propria* and, in the case of SV40-C57BL/6, in the IELs population as well.  
165 As shown in Figure 2D-F, both OMVs elicited a relevant fraction of epitope-specific T cells, which  
166 could be detected both in the *lamina propria* and in the epithelium of the small intestine.

167 ***The protective activity of EcN and OMVs engineered with a tumor epitope correlates***  
168 ***with tumor infiltration of cancer-specific CD8<sup>+</sup> T cells***

169 The data described so far indicate that intestinal bacteria and OMVs have a broad capacity  
170 to induce CD8<sup>+</sup> T cells against immunogenic epitopes in the gut and that the presence of these T  
171 cells correlate with tumor inhibition. Therefore, a plausible mechanism is that intestinal CD8<sup>+</sup> T  
172 cells disseminate systemically and reach the tumors.

173 To support this mechanism, at the end of the challenge experiment depicted in Figure 1,  
174 two tumors from each group receiving either EcN or EcN(*lpp-OVA*) were surgically removed and  
175 the presence of total tumor infiltrating CD8<sup>+</sup> T cells and of infiltrating OVA-specific CD8<sup>+</sup> T cells  
176 was analyzed by flow cytometry. As shown in Figure 1F-G, a similar number of total CD8<sup>+</sup> T cells  
177 was measured in tumors from animals that received EcN and EcN(*lpp-OVA*) ( $8.900 \pm 500$  CD8<sup>+</sup>  
178 T cells/ $10^6$  live cells in both tumors). By contrast, the number of OVA-specific CD8<sup>+</sup> T cells were  
179 two- and three-fold higher in tumors from mice treated with EcN(*lpp-OVA*) (9.2% of OVA-  
180 specific CD8<sup>+</sup> T cells vs 3.88% of OVA-specific CD8<sup>+</sup> T cells) (Figure 1G). The difference in the  
181 number of total and OVA-specific CD8<sup>+</sup> T cells in tumors was confirmed by  
182 immunohistochemistry analysis of tumors from one animal per group stained with fluorescence-  
183 labelled OVA dextramers ( $\text{CD8}^+ \text{ T cells}_{\text{EcN}(\textit{lpp-OVA})} / \text{CD8}^+ \text{ T cells}_{\text{EcN}} = 1.05$ ;  $\text{OVA-specific CD8}^+ \text{ T cells}_{\text{EcN}(\textit{lpp-OVA})} / \text{OVA-specific CD8}^+ \text{ T cells}_{\text{EcN}} = 2.3$ ) (Figure 1G).

185 ***Analysis of CD8<sup>+</sup> T cell populations in the lamina propria and in the tumor by TCR sequencing***

186 Having demonstrated that the oral administration of EcN(*lpp-OVA*) not only induced OVA-  
187 specific CD8<sup>+</sup> T cells in the *lamina propria* but also increased the infiltration of OVA-specific  
188 CD8<sup>+</sup> T cells in tumors, we tried to address the question as to whether the two OVA-specific CD8<sup>+</sup>  
189 T cell populations might have a common origin. CD8<sup>+</sup> T cells were isolated from both intestines  
190 and tumors of animals treated with either EcN or EcN(*lpp-OVA*) (Figure 3A) and their TCR  
191 sequences were compared. The analysis of the  $\beta$  chain sequences revealed a relatively high  
192 clonality of T cells in the tumors from mice that received the EcN gavages, while the T cell

193 population in the *lamina propria* compartment of the same animals was much less diversified, as  
194 highlighted by the values of the Inverse Simpson Index as a measure of immune diversity (Figure  
195 3B). The administration of EcN(*lpp-OVA*) appeared to reduce the diversification of T cells clones  
196 in the tumors. To evaluate the presence of recirculating and potentially tumor-specific T  
197 lymphocytes, GLIPH2 algorithm was employed to detect antigen-specific receptors on the basis  
198 of CDR3 similarity. The algorithm identified a specific CDR3 motif commonly shared in the  
199 *lamina propria* and in the tumors of EcN(*lpp-OVA*)-treated mice. The presence of this specific  
200 motif was statistically significant when compared to its occurrence in a mouse reference dataset  
201 (Figure S3). A deeper analysis of the TCR repertoire enabled the tracking of identical TCR  
202 sequences in different experimental groups. Interestingly, 11 TCR clonotypes were univocally  
203 present in the immune repertoire of T cells identified in the tumors and in the *lamina propria* of  
204 EcN(*lpp-OVA*)-treated mice. Five out of 11 TCR sequences could also be tracked in the tumors,  
205 but not in the *lamina propria*, of EcN-treated mice (Figure 3C).

206 Overall, our data indicate that tumors from EcN-treated mice were infiltrated with a  
207 relevant number of T cell clones carrying TCRs identical to *lamina propria*-associated T cells  
208 (Figure 3C), which were likely elicited by the gut microbiome. However, these T cells were  
209 incapable to control tumor growth. The oral administration of the microbial species EcN(*lpp-OVA*)  
210 expressing a tumor-specific T cell epitope (OVA), resulted in the reorganization of the tumor  
211 infiltrating T cell population, with the concomitant enrichment of fewer T cell clones having TCRs  
212 identical to the TCRs of T cells found in the *lamina propria* and in the tumors of the same animals.  
213 Although not directly demonstrated, such T cells were probably those recognizing the OVA  
214 epitope and were originated at the intestinal site.

### 215 ***Changes in microbiome composition after oral administration of EcN and OMV treatment***

216 In addition, or as an alternative, to the direct role of OVA-specific CD8<sup>+</sup> T cells, tumor  
217 inhibition could be mediated by modifications of the gut microbiome as a consequence of oral  
218 gavages. To exclude this possibility, we followed the microbiome composition via shotgun  
219 metagenomics in animals that were given oral gavages with EcN, EcN(*lpp-OVA*), OMV<sub>EcN</sub> and  
220 Lpp-OVA-OMV<sub>EcN</sub> and were subsequently challenged with OVA-B16F10 cells (Figure 4A, see  
221 Methods). The microbiome composition of mice after three subsequent oral administrations of all  
222 formulations displayed some changes as assessed by Bray-Curtis beta-diversity estimations  
223 (Figure 4B). Even though normal microbiome fluctuations are expected to occur longitudinally,



224 the microbiome variations between T<sub>0</sub> and T<sub>1</sub> were less pronounced in mice receiving vesicles than  
225 bacteria. However, this effect was not due to the colonization of EcN since *E. coli* showed low  
226 relative abundances in all treatment groups (Figure S4). Importantly, the oral administration of  
227 either EcN or EcN(*lpp-OVA*) influenced the microbiome composition in a similar manner between  
228 T<sub>0</sub> and T<sub>1</sub> and between T<sub>0</sub> and T<sub>2</sub>, calculated as Bray-Curtis dissimilarity (P = 0.84 and P = 0.69,  
229 respectively). The same effect was also observed after the gavage with OMV<sub>SEcN</sub> or Lpp-OVA-  
230 OMV<sub>SEcN</sub> (P = 1 and P = 0.57, respectively, Figure 4A). Therefore, the presence of Lpp-OVA in  
231 both EcN and OMVs did not induce more marked changes in microbiome. In fact, our data support  
232 the opposite: the administration of EcN and OMV<sub>SEcN</sub> induced a significant change between T<sub>0</sub>  
233 and T<sub>1</sub> (PERMANOVA P = 0.009 and P = 0.048, respectively) while no significant effect was seen  
234 in EcN(*lpp-OVA*) or Lpp-OVA-OMV<sub>SEcN</sub> treated mice (PERMANOVA P = 0.105 and P = 0.057,  
235 respectively).

236 While the microbiome change patterns are less clear at T<sub>2</sub> (Figure 4B), potentially due to  
237 the tumor growth, this analysis provides evidence that the Lpp-OVA effect on tumor inhibition  
238 was not mediated by substantial overall changes of the microbiome. However, it could still be  
239 possible that specific taxa were directly or indirectly affected by the presence of the epitope.  
240 Considering the abundance of each microbial species we found several taxa that were significantly  
241 over- or under-represented (Figure 4C, Wilcoxon rank sum test, alpha 0.05). Nonetheless, little  
242 agreement was found on the panel of varying taxa among groups between T<sub>0</sub> and T<sub>1</sub> as shown by  
243 the heatmap in Figure 4C. In particular, among the groups that received a gavage with the OVA  
244 epitope, only one uncharacterized and yet-to-be cultivated species named SGB43006 was slightly  
245 significantly increasing at T<sub>1</sub> compared to T<sub>0</sub> (Figure 4D). SGB43006 abundance increased from  
246 0.021% to 0.0395% in EcN(*lpp-OVA*) and from 0.0009% to 0.00946% in Lpp-OVA-OMV<sub>SEcN</sub>.

247 Taken together the data would indicate that the presence or absence of OVA in both EcN  
248 and OMVs was irrelevant with respect to the way the gut microbiome was perturbed by the animal  
249 treatment, thus strengthening the conclusion that the production of OVA-specific CD8<sup>+</sup> T cells  
250 plays a direct role in tumor inhibition.

### 251 ***OMVs engineered with a cancer epitope have a therapeutic effect against tumor growth***

252 We finally asked the question as to whether OMVs decorated with cancer-specific epitopes  
253 could have a therapeutic effect on already implanted tumors. To address this question we  
254 challenged C57BL/6 mice with OVA-B16F10 cells and subsequently animals were given five oral

255 gavages of either OMVs <sub>$\Delta ompA$</sub>  or Lpp-OVA-OMVs <sub>$\Delta ompA$</sub>  over a period of 21 days (Figure 5A). As  
256 shown in Figure 5B, tumor growth in mice treated with Lpp-OVA-OMVs <sub>$\Delta ompA$</sub>  was delayed in a  
257 statistically significant manner with respect to animals receiving “empty” OMVs <sub>$\Delta ompA$</sub>  (P=0.0031).  
258 Moreover, while four out of five mice treated with OMVs <sub>$\Delta ompA$</sub>  reached a near to death status and  
259 therefore were sacrificed, none of the Lpp-OVA-OMVs <sub>$\Delta ompA$</sub> -treated mice were sacrificed before  
260 the end of the experiment.

261

## 262 **Discussion**

263 The underpinning mechanisms through which microbes influence cancer growth remain to  
264 be fully elucidated. The observations that patients responding and non-responding to checkpoint  
265 inhibitors can be stratified based on their microbiome composition (Routy et al., 2018b) and that  
266 the resistance to anti-PD-1 therapy in melanoma patients could be overcome by responder-derived  
267 fecal microbiota transplantation (FMT) (Davar et al., 2021) have prompted several laboratories to  
268 characterize the composition of the gut microbiome by 16S RNA/whole genome sequencing in  
269 search of microbial species with anti-tumor properties. *Enterococcus hirae*, *Bacteroides fragilis*,  
270 and *Akkermansia muciniphila* have been associated with favorable clinical outcome in cancer  
271 patients (Daillère et al., 2016; Rong et al., 2017; Routy et al., 2018b; Vétizou et al., 2015) and  
272 recently a pool of eleven bacteria has been proposed as a potential probiotic therapy (Tanoue et  
273 al., 2019). However, from all published data a “consensus” list of “anti-tumor bacterial species”  
274 remains to be unambiguously defined and it is safe to say that all studies converge to the conclusion  
275 that an important property of a “healthy, anti-tumor” microbiome is its diversity.

276 Regarding how microbiome exerts the anti-tumor effects, proposed mechanisms envisage  
277 the production of specific metabolites and/or the stimulation at the mucosal level of inflammatory  
278 cytokines which can work in a paracrine manner (Daillère et al., 2016; Pietrocola et al., 2016;  
279 Vétizou et al., 2015; Zitvogel et al., 2018). Also, gut-derived bacteria have been isolated from  
280 tumors, where they can promote pro- and anti-tumor effects (Geller et al., 2017; Hieken et al.,  
281 2016; Jin et al., 2019; Nejman et al., 2020; Pushalkar et al., 2018; Silva-Valenzuela et al., 2016).  
282 Finally, the “molecular mimicry” hypothesis has been proposed (Chai et al., 2017; Gil-Cruz et al.,  
283 2019; Perez-Muñoz et al., 2015; Rubio-Godoy et al., 2002; Vujanovic et al., 2007; Yang et al.,  
284 2014) holding that the anti-tumor effect of microbiome would be mediated by microbial-specific  
285 T cells, which accidentally recognize mutation-derived tumor neo-epitopes.

286 This work was conceptualized with the aim of demonstrating that cross-reactivity between  
287 the microbiome and cancer epitopes is involved in cancer immunity. We showed that when the  
288 human probiotic EcN expressing the OVA epitope was orally administered to C57BL/6 mice, high  
289 frequencies of OVA-specific T cells accumulated in the *lamina propria*. Moreover, oral delivery  
290 of EcN(*lpp-OVA*) reduced the growth of subcutaneous tumors in mice challenged with an OVA-  
291 B16F10 cell line. Importantly, tumor inhibition correlated with the elicitation of OVA-specific  
292 CD8<sup>+</sup> T cells in the *lamina propria* and their infiltration in tumors, and our microbiome data  
293 supports the evidence that such T cells were the major players in the observed anti-tumor  
294 responses. As expected, the oral administration of both wild type EcN and EcN(*lpp-OVA*) modified  
295 the murine microbiome but the observed modifications were relatively modest and, importantly,  
296 not influenced by the expression of OVA in EcN. Even at the resolution of the shotgun sequencing,  
297 no specific single microbial species could be detected, which substantially differed from animals  
298 treated with wild type EcN and EcN(*lpp-OVA*). This would rule out the possibility that the anti-  
299 tumor activity of EcN(*lpp-OVA*) could be the result of an indirect effect acting on the alteration of  
300 other commensal species.

301 A question which remains to be fully addressed is the mechanism through the oral  
302 administration of EcN(*lpp-OVA*) promoted the enrichment of OVA-specific CD8<sup>+</sup> T cells in the  
303 tumor environment. Our TCR sequencing data revealed the presence of T cell clones in the tumors  
304 and *lamina propria* T cells for EcN(*lpp-OVA*)-treated mice sharing identical TCRs, suggesting a  
305 common origin of these T cell populations. Therefore, the OVA-specific T cells induced by  
306 EcN(*lpp-OVA*) at the mucosal level could be disseminated systemically, eventually reaching tumor  
307 environment. An interesting observation emerging from our TCR sequencing data, is the high  
308 polyclonality of CD8<sup>+</sup> T cells isolated from tumors of animals that received wild type EcN and a  
309 relevant number of TILs share TCRs identical to those found in the *lamina propria*. When animals  
310 are treated with EcN(*lpp-OVA*) TILs polyclonality is reduced. This would support the notion that  
311 tumors can be infiltrated with “exhausted” T cells which are incapable of effectively eliminated  
312 tumor cells. Thus, reducing the abundances of such T cells through the administration of  
313 microbiome species carrying properly selected cross-reactive epitopes could be a way to potentiate  
314 anti-tumor immunity.

315 OVA-specific CD8<sup>+</sup> T cells were also found in tumors from EcN-treated animals, in line  
316 with the fact the all animals were challenged with an OVA-B16F10 cell line. Therefore, the

317 possibility that the high frequency of OVA-specific CD8<sup>+</sup> T cells observed in tumors of EcN(*lpp*-  
318 *OVA*)-treated mice was due to an amplification of locally induced T cells cannot be ruled out. As  
319 already pointed out, different microbial species have been isolated from animal and human tumors  
320 (Atreya and Turnbaugh, 2020) and such species often have intestinal origin. These intra-tumor  
321 bacteria could induce T cells (Kalaora et al., 2021), which eventually recognize tumor-specific  
322 cross-reacting epitopes.

323 An interesting piece of information emerging from our study is the contribution of OMVs  
324 to the elicitation of CD8<sup>+</sup> T cells by intestinal bacteria. Oral delivery of OVA-OMVs derived from  
325 EcN(*lpp-OVA*) and *E. coli* BL21(DE3) $\Delta$ *ompA*(*lpp-OVA*) elicited high frequencies of OVA-  
326 specific CD8<sup>+</sup> T cells and protected mice from the challenge with OVA-B16F10 cells. The  
327 capacity of OMVs to stimulate intestinal CD8<sup>+</sup> T cells was not restricted to OVA as demonstrated  
328 by the isolation of CD8<sup>+</sup> T cells after oral administration of MBP-AH1-OMV<sub>S $\Delta$ ompA</sub> in BALB/c  
329 mice and FhuD2-SV40-OMV<sub>S $\Delta$ ompA</sub> in C57BL/6 mice.

330 OMVs are fascinating organelles released by all Gram-negative bacteria with a plethora of  
331 biological functions such as intra- and inter-species cross talk and bacteria-host interactions (Kulp  
332 and Kuehn, 2010). Bacterial vesicles are known to be present in the intestine and they include both  
333 OMVs and vesicles produced by Gram-positive bacteria (Park et al., 2018). In the gastrointestinal  
334 tract, OMVs are believed to contribute to maintaining the intestinal microbial ecosystem and  
335 mediating the delivery of bacterial effector molecules to host cells to modulate their physiology.  
336 Shen et al. (Shen et al., 2012) showed that intestinal *Bacteroides fragilis* releases OMVs decorated  
337 with capsular polysaccharide (PSA). Dendritic cells sense OMV-associated PSA through TLR2  
338 and stimulate the production of regulatory T cells, which protect from autoimmune and/or  
339 inflammatory diseases. Moreover, OMVs produced by the major human gut commensal bacterium  
340 *Bacteroides thetaiotaomicron* (Bt) have been shown to be acquired by intestinal epithelial cells via  
341 dynamin-dependent endocytosis followed by intracellular trafficking to endo-lysosomal vesicles.  
342 OMV<sub>S $\Delta$ Bt</sub> were also shown to transmigrate through epithelial cells via a paracellular route and to  
343 reach systemic tissues, leading to suggest that OMVs may act as a long-distance microbiota–host  
344 communication system (Jones et al., 2020). The capacity of bacterial vesicles to disseminate  
345 systemically in the host and their potential dual role in tumor development and inhibition has been  
346 recently reviewed (Chronopoulos and Kalluri, 2020).

347 Our work provides evidence of a broader OMV function, which extends to cancer  
348 immunity via MM. Thanks to their small size, OMVs can navigate in the gut and be easily  
349 internalized by intestinal DCs. The pan-proteome of OMVs from all gut bacteria has the potential  
350 to generate a large repertoire of T cells, which act as sentinels to eliminate host cells in which  
351 mutations eventually generate cross-reacting immunogenic epitopes. Such immunological role of  
352 OMVs, and potentially of all vesicles released by intestinal bacteria, would underline how  
353 inseparable evolution has made mammals and their microbiota and humans may be viewed as a  
354 single unit of evolutionary selection comprised of a host and its associated microbes (Rosenberg  
355 et al., 2009; Shen et al., 2012).

356 One last comment deserves the translational potential of our work. Our data show that the  
357 oral delivery of OMVs protects mice from tumor challenge both in the prophylactic and therapeutic  
358 modalities. This leads to the attractive hypothesis that OMVs engineered with cancer neo-epitopes  
359 could be exploited, in combination with other therapies such as checkpoint inhibitors, to potentiate  
360 the elicitation of cancer-specific T cell responses. The ease with which OMVs can be manipulated  
361 with multiple epitopes (Fantappiè et al., 2014, 2017; Grandi et al., 2017, 2018; Irene et al., 2019;  
362 Zanella et al., 2021) and can be purified from the culture supernatant, make the production of  
363 personalized oral cancer vaccines particularly attractive.

## 364 **Materials and Methods**

### 365 ***Bacterial strains, cell lines and mouse strains***

366 DH5 $\alpha$ , HK100 were used for cloning experiments. *Escherichia coli* Nissle 1917 (EcN) was  
367 isolated from the probiotic EcN<sup>®</sup> (Cadigroup, Rome, Italy) and *E. coli* BL21(DE3) $\Delta ompA$  was  
368 produced in our laboratory (Fantappiè et al., 2014). *E. coli* strains were grown in LB at 37°C or  
369 30°C in static or shaking conditions (200 rpm). When required, LB was supplemented with 50  
370  $\mu$ g/ml kanamycin, 25  $\mu$ g/ml chloramphenicol, 0.2% L-arabinose and 5% sucrose. Stock  
371 preparations of *E. coli* strains in LB 20% glycerol were stored at -80°C.

372 OVA-B16F10 cell line, a B16F10 cell line transfected with a plasmid carrying a complete copy of  
373 chicken ovalbumin (OVA) cDNA and the Geneticin (G418) resistance gene, was kindly provided  
374 by Cristian Capasso and Prof. Vincenzo Cerullo from the Laboratory of Immunovirotherapy, Drug  
375 Research Program, Faculty of Pharmacy, University of Helsinki. OVA-B16F10 cell line was  
376 cultured in RPMI supplemented with 10% FBS, penicillin/streptomycin/L-glutamine and 5 mg/ml  
377 Geneticin<sup>™</sup> (Gibco, Thermo Fisher Scientific, Waltham, MA, USA) and grown at 37°C in 5%  
378 CO<sub>2</sub>. C57BL/6 or BALB/c female 4-8 week old mice were purchased from Charles River  
379 Laboratories and kept and treated in accordance with the Italian policies on animal research at the  
380 animal facilities of Toscana Life Sciences, Siena, Italy and Department of Cellular, Computational  
381 and Integrative Biology (CIBIO) – University of Trento, Italy. Mice were caged in groups of 5/8  
382 animals in ventilated cages. Mice within the same cage received the same treatment.

### 383 ***Engineering EcN and E. coli BL21(DE3) $\Delta ompA$ strains with CD8<sup>+</sup> T cell epitopes***

384 The pCRISPR-*lpp*-sgRNA plasmid, used for EcN mutagenesis, is a derivative of pCRISPR-*sacB*  
385 and codifies for a synthetic small guide RNA (sgRNA) (Zerbini et al., 2017). The *lpp*-sgRNA is  
386 composed by a 20 nt guide specific for *lpp*, a 42 nt Cas9-binding hairpin (Cas9 handle) and a 40  
387 nt transcription terminator of *S. pyogenes* (Table S1) (Qi et al., 2013). For the construction of  
388 pCRISPR-*lpp*-sgRNA, a DNA fragment containing the *rrnB* T1 transcription terminator, the -10  
389 and -35 consensus sequences of the J23119 promoter and the *lpp*-sgRNA chimera (Table S1) was  
390 synthesized by GeneArt (Thermo Fisher Scientific, Waltham, MA, USA) and cloned in pCRISPR-  
391 *sacB* using AvrII and XhoI restriction sites, thus replacing the gRNA cassette. The pCRISPR-*lpp*-  
392 gRNA plasmid, used for BL21(DE3) $\Delta ompA$  mutagenesis, is a derivative of pCRISPR-*sacB* in  
393 which a 30 nt DNA sequence coding for an *lpp*-gRNA guide specific for *lpp* is cloned using  
394 MB1360 and MB1361 oligonucleotides (Table S2) as described previously (Zerbini et al., 2017).

395 Both pCRISPR-*lpp*-sgRNA and pCRISPR-*lpp*-gRNA contain a polylinker cloned into pCRISPR-  
396 *sacB* by PIPE-PCR with primers MB1346 and MB1347 and transformation in *E. coli* HK100  
397 competent cells. The *lpp*-OVA donor DNA (dDNA) (Table S1) was chemically synthesized  
398 (GeneArt, Thermo Fisher Scientific, Waltham, MA, USA) with termini carrying the XhoI and NsiI  
399 restriction site sequences. It contains an EcN genomic region of 231 bp upstream from the *lpp* stop  
400 codon, followed by the OVA sequence flanked by restriction sites (NheI, Not and NdeI) and an  
401 EcN genomic region of 397 bp downstream from the *lpp* stop codon. In the arm upstream to OVA,  
402 the *lpp* TAC codon (Tyr), placed 9 bp upstream to the TAA stop codon, has been changed into  
403 TAT (Tyr) in order to eliminate the PAM sequence placed 5 bp upstream to the stop codon.  
404 The construction of pET21-MBP-AH1 plasmid expressing the *E. coli* Maltose Binding protein  
405 (MBP) fused to three repeated copies of AH1 peptide linked by a Glycine–Serine (GS) spacers  
406 (Table S3) was obtained from pET21-MBP (Grandi et al., 2018) by ligating the AH1 DNA  
407 fragment carrying the BamHI/XhoI flags.  
408 The pET21-FhuD2-SV40 plasmid carrying the *Staphylococcus aureus* Ferric hydroxamate  
409 receptor 2 (FhuD2) fused to one copy of SV40 IV peptide (Degl’Innocenti et al., 2005; Mylin et  
410 al., 2000), was assembled using the PIPE method (Klock and Lesley, 2009). Briefly, pET21-  
411 FhuD2 was linearized by PCR, using FhuD2-v-R and pET-V-F primers (Table S2). In parallel, the  
412 synthetic DNA encoding one copy of SV40 IV epitope (Table S3) was amplified by PCR with the  
413 forward FhuD2-SV40-F and the reverse FhuD2-SV40-R primers (Table S2). The PCR products  
414 were mixed together and used to transform *E. coli* HK100 strain. To confirm the correct gene  
415 fusions, plasmids were sequenced (Eurofins, Ebersberg, Germany, EU) and *E. coli*  
416 BL21(DE3) $\Delta ompA$  strain was transformed with pET21-MBP-AH1 and pET21-FhuD2-SV40  
417 plasmids and the derived recombinant strain was used for the production of engineered MBP-AH1  
418 and FhuD2-SV40 OMVs, respectively.  
419 EcN(pCas9 $\lambda$ red) and BL21(DE3) $\Delta ompA$ (pCas9 $\lambda$ red) strains and competent cells were prepared  
420 as described previously (Zerbini et al., 2017). For genome engineering, 50  $\mu$ l of EcN(pCas9 $\lambda$ red)  
421 or BL21(DE3) $\Delta ompA$ (pCas9 $\lambda$ red) competent cells were co-transformed with 100 ng of pCRISPR-  
422 *lpp*-sgRNA or pCRISPR-*lpp*-gRNA, respectively, and with 200 ng of dDNA. Cells were then  
423 incubated at 30°C (200 rpm) for 3 hours, plated on LB agar supplemented with chloramphenicol  
424 and kanamycin and incubated overnight at 37°C. The day after, single colonies were screened by  
425 colony PCR to identify clones carrying the OVA sequence insertion at the 3’-end of the *lpp* gene.

426 Primers MB1336 and *lpp2* (Table S2) were designed to anneal upstream and downstream the  
427 insertion site, thus generating amplicons of different lengths in the presence of *lpp-OVA* (609 nt)  
428 or wt *lpp* (549 nt). Positive clones were cured from pCRISPR-*sacB* derivative plasmids and from  
429 pCas9 $\lambda$ red as described previously (Zerbini et al., 2017). The correctness of the *lpp-OVA* gene  
430 sequence was verified by sequencing using primers MB1336, *lpp1*, *lpp2*, MB1337, MB1390  
431 (Table S2).

#### 432 ***OMV preparation***

433 OMVs from EcN and EcN(*lpp-OVA*) were prepared growing the strains in an EZ control bioreactor  
434 (Applikon Biotechnology, Schiedam, Netherlands) as previously described (Zanella et al., 2021).  
435 Cultures were started at an OD<sub>600</sub> of 0.1 and grown until the end of the exponential phase at 30°C,  
436 pH 6.8 ( $\pm 0.2$ ), dO<sub>2</sub> > 30%, 280–500 rpm. OMVs were then purified and quantified as previously  
437 described (Zanella et al., 2021). BL21(DE3) $\Delta ompA$  and BL21(DE3) $\Delta ompA$ (*lpp-OVA*) were grown  
438 at 37°C and 180 rpm in LB medium (starting OD<sub>600</sub> = 0.1) and when the cultures reached an OD<sub>600</sub>  
439 value of 0.4-0.6 were maintained at 37°C under agitation for two additional hours. Finally, the  
440 purification of OMVs from BL21(DE3) $\Delta ompA$ (pET-MBP-AH1) and BL21(DE3) $\Delta ompA$ (pET-  
441 FhuD2-SV40) was carried out growing the cultures at OD<sub>600</sub> = 0.5, adding 0.1 mM IPTG and  
442 continuing the incubation for 2 h at 37°C.

443 Culture supernatants were separated from biomass by centrifugation at 4000g for 20 minutes. After  
444 filtration through a 0.22- $\mu$ m pore size filter (Millipore, Burlington, Massachusetts, USA), OMVs  
445 were isolated, concentrated and diafiltrated from the supernatants using Tangential Flow Filtration  
446 (TFF) with a Cytiva Äkta Flux system. OMVs were quantified using DC protein assay (Bio-Rad,  
447 Hercules, California, USA).

#### 448 ***OVA-Specific CD8<sup>+</sup> T cells analysis in lamina propria and tumor tissue***

449 For the analysis of T cells in the *lamina propria*, C57BL/6 or BALB/c mice were given bacteria  
450 ( $10^9$  CFUs) or OMVs (10  $\mu$ g) by oral gavages at day 0, day 3 and 6 and at day 15 mice were  
451 sacrificed and small intestines were collected. In a first step, the intraepithelial lymphocytes (IELs)  
452 were dissociated from the mucosa by shaking the tissue in a pre-digestion solution, using the  
453 Lamina Propria Dissociation kit (Miltenyi Biotech, Bergisch Gladbach, Germany) according to  
454 the manufacturer's instruction. Then the *lamina propria* tissue was treated enzymatically and  
455 mechanically dissociated into a single-cell suspension by using the gentleMACS<sup>TM</sup> Dissociators  
456 (Miltenyi Biotech, Bergisch Gladbach, Germany).



457 Tumor-infiltrating lymphocytes were isolated from subcutaneous OVA-B16F10 tumors as  
458 follows. Tumors (at least two tumors per group) were collected and minced into pieces of 1–2 mm  
459 of diameter using a sterile scalpel, filtered using a Cell Strainer 70  $\mu\text{m}$  and transferred into 50-ml  
460 tubes. Then, the tumor tissue was enzymatically digested using the Tumor Dissociation kit  
461 (Miltenyi Biotech, Bergisch Gladbach, Germany) according to the manufacturer's protocol and  
462 the gentleMACS™ Dissociators were used for the mechanical dissociation steps. After  
463 dissociation, the sample was passed through to a 30  $\mu\text{m}$  filter to remove larger particles from the  
464 single-cell suspension.

465 At the end of the dissociation protocol,  $1-2 \times 10^6$  cells from *lamina propria* and tumors were  
466 incubated with 5  $\mu\text{l}$  of OVA<sub>257-264</sub> Dextramer-PE (SIINFEKL, IMMUDEX, Virum Denmark) for  
467 10 minutes at room temperature in a 96-well plate. As negative control the unrelated dextramer  
468 SSYSYSSL was used (IMMUDEX, Virum Denmark). Then, cells were incubated with  
469 NearIRDead cell staining Kit (Thermo Fisher, Waltham, MA, USA) 20 minutes on ice in the dark.  
470 After two washes with PBS, samples were re-suspended in 25  $\mu\text{l}$  of anti-mouse CD16/CD32-  
471 Fc/Block (BD Bioscience, San Jose, CA, USA), incubated 15 minutes on ice and then stained at  
472 RT in the dark for 20 minutes with the following mixture of fluorescent-labeled antibodies: CD3-  
473 APC (Biolegend, San Diego, CA), CD4-BV510 (Biolegend, San Diego, CA) and CD8a-PECF594  
474 (BD Bioscience, San Jose, CA, USA). After two washes with PBS, cells were fixed with Cytotfix  
475 (BD Bioscience, San Jose, CA, USA) for 20 minutes on ice, then washed twice and re-suspended  
476 in PBS. Samples were analyzed using a BD LSRII and the raw data were elaborated using *FlowJo*  
477 software. For the evaluation of the percentage of CD8<sup>+</sup>/OVA<sup>+</sup> T cells in *lamina propria* and tumors  
478 the following gating strategy was applied. After selection of NearIRDead - cells (alive cells) and  
479 identification of FSC (forward scatter) and SSC (side scatter) morphology typical for the T cell  
480 population, only the SSW- cells (singlets) were selected and analyzed. This population was first  
481 separated in CD3<sup>+</sup> and CD3<sup>-</sup> cells and the CD3<sup>+</sup> population was subsequently discriminated as  
482 CD4<sup>+</sup> and CD8<sup>+</sup> cells. Double positive CD8<sup>+</sup>/OVA<sup>+</sup> T cells were finally selected.

### 483 ***Mouse tumor models***

484 Bacteria ( $10^9$  CFUs) and OMVs (10  $\mu\text{g}$ ) were given to C57BL/6 mice by oral gavage in 100  $\mu\text{l}$   
485 volume (PBS). C57BL/6 animals were subcutaneously challenged with  $2.8 \times 10^5$  OVA-B16F10  
486 cells. Tumor growth was followed for at least 25 days after challenge and tumor volumes were  
487 determined with a caliper using the formula  $(A \times B^2)/2$ , where A is the largest and B the smallest

488 diameter of the tumor. For the therapeutic protocol, mice were first challenged with  $2.8 \times 10^5$  OVA-  
489 B16F10 cells and subsequently treated with oral gavages (bacteria or OMVs) as described above.  
490 Tumor growth was monitored for at least 25 days. Statistical analysis (unpaired, two-tailed  
491 Student's t-test) and graphs were processed using GraphPad Prism 5.03 software.

#### 492 ***Immunohistochemistry***

493 Tumors from sacrificed mice were collected and maintained in RPMI on ice. Subsequently were  
494 covered with Tissue-Tek OCT compound and frozen with isopentane (VWR, Radnor,  
495 Pennsylvania, USA) kept in dry ice. 7- $\mu$ m thick sections were cut from frozen OCT blocks, using  
496 Leica CM1950 Cryostat. Frozen sections were blocked with PBS 0.5% Bovine Serum Albumin  
497 (BSA, Sigma-Aldrich, St. Louis, MO, USA) followed by an overnight incubation at +4°C with  
498 anti-OVA<sub>257-264</sub> Dextramer PE conjugate (SIINFEKL, IMMUDEx, Virum Denmark) diluted 1:30  
499 in blocking solution. Then sections were fixed with PBS 2% paraformaldehyde (Sigma-Aldrich,  
500 St. Louis, MO, USA) and incubated with polyclonal Rabbit anti- PE (Abcam, Cambridge, UK)  
501 diluted 1:1.000 in PBS for 1 hour at room temperature. Subsequently, sections were incubated with  
502 goat anti-Rabbit Alexa-Fluor 488 conjugate (Molecular Probe, Waltham, MA, USA) diluted 1:500  
503 in PBS, for 1 hour at room temperature. Sections were counterstained with 4',6- Diamidino-2-  
504 phenylindole di-hydrochloride (DAPI, Sigma-Aldrich, St. Louis, MO, USA) diluted 1:3.000 in  
505 PBS, and then mounted with Dako Fluorescence mounting medium (Dako, Agilent Technologies,  
506 Santa Clara, CA, USA) and stored at +4°C until ready for image analysis. In order to confirm the  
507 specificity of the dextramer staining, a single immunofluorescence staining was performed to  
508 evaluate the effective presence of CD8<sup>+</sup> cells. After an overnight air-drying step, frozen sections  
509 (see above) were fixed in Acetone (VWR, Radnor, Pennsylvania, USA) for 10 minutes, air-dried  
510 for 20 minutes and incubated with 5% goat serum in PBS (Sigma-Aldrich, St. Louis, MO, USA)  
511 to block non-specific reactions. Then, sections were incubated for 30 minutes at room temperature  
512 with a rat monoclonal antibody anti-Mouse CD8 (BD Pharmingen, BD Bioscience, San Jose, CA,  
513 USA) diluted 1:50 in blocking solution. Subsequently, sections were incubated for 1 hour at room  
514 temperature with goat anti-rat Alexa-Fluor 488 conjugate antibody (Molecular Probe,  
515 ThermoFisher Scientific Waltham, MA, USA) diluted 1:500 in PBS. Finally, sections were  
516 counterstained with DAPI, and mounted with Dako Fluorescence mounting medium as described  
517 above. Whole slide fluorescence images were acquired using Nanozoomer S60 automated slide  
518 scanner (Hamamatsu, Hamamatsu City, Japan). Positive cells were manually counted using NDP

519 View2 Plus software (Hamamatsu, Hamamatsu City, Japan) on a total of 6 sections/tumor,  
520 covering a tissue depth of ~300  $\mu\text{m}$ . Total number of positive cells and area of tissue sections were  
521 measured, and cells density calculated as number of positive cells/ $\text{mm}^2$ .

### 522 ***TCR sequencing***

523 At the end of the dissociation protocol (as described above),  $\text{CD8}^+$  cells from *lamina propria* and  
524 tumors were magnetically labeled with CD8 MicroBeads (Miltenyi Biotech, Bergisch Gladbach,  
525 Germany) according to the manufacturer's manual. Then, the cell suspension was loaded onto a  
526 MACS<sup>®</sup> Column, which was placed in the magnetic field of a MACS Separator. The magnetically  
527 labeled  $\text{CD8}^+$  T cells were retained within the column and eluted after removing the column from  
528 the magnetic field. At the end of separation,  $5\text{-}8\times 10^3$   $\text{CD8}^+$  T cells from *lamina propria* or  $15\text{-}$   
529  $20\times 10^3$   $\text{CD8}^+$  T cells from tumors were processed for the RNA extraction using the Arcturus<sup>®</sup>  
530 PicoPure<sup>®</sup> RNA Isolation Kit (Thermo Fisher, Waltham, MA, USA) according to the  
531 manufacturer's protocol.

532 Complementarity determining region (CDR) 3 sequences of the TCR  $\beta$  chain were amplified by  
533 using a RACE approach (Bolotin et al., 2012). Samples were sequenced by using an Illumina  
534 MiSeq sequencer and CDR3 clonotypes identified using the MiXCR software (Bolotin et al.,  
535 2015). Sequences retrieved only once were excluded from the analysis. Normalized Shannon-  
536 Wiener index and Inverse Simpson index were calculated using the VDJtools package (PMID:  
537 26606115). For comparing diversity indices between samples, original data were down-sampled  
538 to the size of the smallest dataset.

539 GLIPH2 algorithm (Huang et al., 2020) was employed to identify clusters of TCR sequences  
540 predicted to bind the same MHC-peptide. For this analysis, mMouse CD8 TCR set was selected  
541 as reference dataset and all amino acid were considered as interchangeable.

### 542 ***Shotgun Whole Genome Sequencing of the gut microbiome***

543 Bacteria or OMVs were administered to mice by oral gavage with 100  $\mu\text{l}$  of PBS containing  $10^9$   
544 bacteria cells or 10 $\mu\text{g}$  of OMVs, respectively. Fecal samples were collected before the first gavage  
545 ( $T_0$ ), before tumor challenge ( $T_1$ ) and when animals were sacrificed ( $T_2$ ). Total DNA was purified  
546 from collected feces using the Quick-DNA Fecal/Soil Microbe Miniprep Kit (Zymo Research,  
547 Irvine, Canada, USA) according to the manufacturer's instruction and subjected to shotgun  
548 sequencing. Sequencing libraries were prepared using the Illumina<sup>®</sup> DNA Prep, (M) Tagmentation  
549 kit (Illumina, San Diego, California, USA), following the manufacturer's guidelines. A cleaning

550 step on the pool with 0.6× Agencourt AMPure XP beads was implemented. Sequencing was  
551 performed on a Novaseq600 S4 flowcell (Illumina, San Diego, California, USA) at the internal  
552 sequencing facility at University of Trento, Trento, Italy. Metagenomic shotgun sequences were  
553 quality filtered using trim galore discarding all reads of quality <20 and shorter than 75  
554 nucleotides. Filtered reads were then aligned to the human genome (hg19) and the PhiX genome  
555 for human and contaminant DNA removal using Bowtie 2, v.2.2.8 (Langmead and Salzberg,  
556 2012), yielding an average of 40 million bases in high-quality reads in each sample. Species-level  
557 microbial abundances were obtained through the bioBakery suite of tools using MetaPhlAn v.4.0  
558 (Beghini et al., 2021) with default settings (database January 2021). Relative abundances at species  
559 level were analyzed in R. Beta diversity was calculated using the Bray-Curtis distance. Differential  
560 abundant species between T<sub>0</sub>/T<sub>1</sub> and T<sub>0</sub>/T<sub>2</sub> were discovered using a non-paired Wilcoxon test and  
561 selected based on a P < 0.05.

#### 562 ***SDS-PAGE and Western Blot analysis***

563 In order to prepare total lysates, bacteria were grown in LB broth to an OD<sub>600</sub> of 0.5, pelleted in a  
564 bench-top centrifuge and resuspended in Laemmli loading buffer to normalize cell density to a  
565 final OD<sub>600</sub> of 10. OMVs were prepared as described above. 10 or 1 µl of total lysate and 10 or 1  
566 µg of OMVs were separated on Criterion™ TGX Stain-Free™ any kD™ gel (Bio-Rad, Hercules,  
567 California, USA) for Coomassie staining or Western Blot, respectively, together with a protein  
568 marker (PM2610, SMOBIO Technology, Inc.). Gels were stained with ProBlue Safe Stain  
569 Coomassie (Giotto Biotech, Sesto Fiorentino Firenze, Italy, EU). For western blot, proteins were  
570 transferred onto nitrocellulose filters using iBlot™ gel transfer system (Invitrogen). Filters were  
571 blocked in PBS with 10% skimmed milk and 0.05% Tween for 45 min. and then incubated in a  
572 1:1000 dilution of the required immune sera in PBS with 3% skimmed milk and 0.05% Tween for  
573 60 minutes. Polyclonal antibodies against OVA or SV40 were obtained from GenScript  
574 (GenScript, Piscataway, New Jersey, USA) by immunizing rabbits with CGQLESIINFEKLTE or  
575 VVYDFLKC synthetic peptide, respectively. Filters were then washed 3 times in PBS-0.05%  
576 Tween, incubated in a 1:2000 dilution of peroxidase-conjugated anti-rabbit immunoglobulin  
577 (Dako, Santa Clara, California, USA) in PBS with 3% skimmed milk and 0.05% Tween for 45  
578 min., washed 3 times in PBS-Tween and once in PBS. Before acquiring the signals, filters were  
579 treated with Amersham™ ECL Select™ Western Blot Detection reagent (GE Healthcare, Chicago,  
580 Illinois, USA).

581 **References:**

- 582 Atreya, C.E., and Turnbaugh, P.J. (2020). Probing the tumor micro(b)environment. *Science* 368,  
583 938–939.
- 584 Balachandran, V.P., Łuksza, M., Zhao, J.N., Makarov, V., Moral, J.A., Remark, R., Herbst, B.,  
585 Askan, G., Bhanot, U., Senbabaoglu, Y., et al. (2017). Identification of unique neoantigen qualities  
586 in long-term survivors of pancreatic cancer. *Nature* 551, 512–516.
- 587 Beghini, F., McIver, L.J., Blanco-Míguez, A., Dubois, L., Asnicar, F., Maharjan, S., Mailyan, A.,  
588 Manghi, P., Scholz, M., Thomas, A.M., et al. (2021). Integrating taxonomic, functional, and strain-  
589 level profiling of diverse microbial communities with bioBakery 3. *Elife* 10, e65088.
- 590 Bessell, C.A., Isser, A., Havel, J.J., Lee, S., Bell, D.R., Hickey, J.W., Chaisawangwong, W.,  
591 Bieler, J.G., Srivastava, R., Kuo, F., et al. (2020). Commensal bacteria stimulate antitumor  
592 responses via T cell cross-reactivity. *JCI Insight* 5, e135597.
- 593 Bolotin, D.A., Mamedov, I.Z., Britanova, O. V., Zvyagin, I. V., Shagin, D., Ustyugova, S. V.,  
594 Turchaninova, M.A., Lukyanov, S., Lebedev, Y.B., and Chudakov, D.M. (2012). Next generation  
595 sequencing for TCR repertoire profiling: Platform-specific features and correction algorithms. *Eur.*  
596 *J. Immunol.* 42, 3073–3083.
- 597 Bolotin, D.A., Poslavsky, S., Mitrophanov, I., Shugay, M., Mamedov, I.Z., Putintseva, E. V., and  
598 Chudakov, D.M. (2015). MiXCR: Software for comprehensive adaptive immunity profiling. *Nat.*  
599 *Methods* 12, 380–381.
- 600 Bresciani, A., Paul, S., Schommer, N., Dillon, M.B., Bancroft, T., Greenbaum, J., Sette, A.,  
601 Nielsen, M., and Peters, B. (2016). T-cell recognition is shaped by epitope sequence conservation  
602 in the host proteome and microbiome. *Immunology* 148, 34–39.
- 603 Chai, J.N., Peng, Y., Rengarajan, S., Solomon, B.D., Ai, T.L., Shen, Z., Perry, J.S.A., Knoop,  
604 K.A., Tanoue, T., Narushima, S., et al. (2017). Helicobacter species are potent drivers of colonic  
605 T cell responses in homeostasis and inflammation. *Sci. Immunol.* 2, eaal5068.
- 606 Chronopoulos, A., and Kalluri, R. (2020). Emerging role of bacterial extracellular vesicles in  
607 cancer. *Oncogene* 39, 6951–6960.
- 608 Cook, D.P., Cunha, J.P.M.C.M., Martens, P.J., Sassi, G., Mancarella, F., Ventriglia, G., Sebastiani,  
609 G., Vanherwegen, A.S., Atkinson, M.A., Van Huynegem, K., et al. (2020). Intestinal delivery of  
610 proinsulin and IL-10 via *Lactococcus lactis* combined with low-dose anti-CD3 restores tolerance  
611 outside the window of acute type 1 diabetes diagnosis. *Front. Immunol.* 11, 1103.

612 Daillère, R., Vétizou, M., Waldschmitt, N., Yamazaki, T., Isnard, C., Poirier-Colame, V., Duong,  
613 C.P.M., Flament, C., Lepage, P., Roberti, M.P., et al. (2016). Enterococcus hirae and Barnesiella  
614 intestinihominis facilitate cyclophosphamide-induced therapeutic immunomodulatory effects.  
615 *Immunity* 45, 931–943.

616 Davar, D., Dzutsev, A.K., McCulloch, J.A., Rodrigues, R.R., Chauvin, J.M., Morrison, R.M.,  
617 Deblasio, R.N., Menna, C., Ding, Q., Pagliano, O., et al. (2021). Fecal microbiota transplant  
618 overcomes resistance to anti-PD-1 therapy in melanoma patients. *Science*. 371, 595–602.

619 Degl’Innocenti, E., Grioni, M., Boni, A., Camporeale, A., Bertilaccio, M.T.S., Freschi, M.,  
620 Monno, A., Arcelloni, C., Greenberg, N.M., and Bellone, M. (2005). Peripheral T cell tolerance  
621 occurs early during spontaneous prostate cancer development and can be rescued by dendritic cell  
622 immunization. *Eur. J. Immunol.* 35, 66–75.

623 Fantappiè, L., Santis, M. de, Chiarot, E., Carboni, F., Bensi, G., Jousson, O., Margarit, I., and  
624 Grandi, G. (2014). Antibody-mediated immunity induced by engineered Escherichia coli OMVs  
625 carrying heterologous antigens in their lumen. *J. Extracell. Vesicles* 3, 24015.

626 Fantappiè, L., Irene, C., De Santis, M., Armini, A., Gagliardi, A., Tomasi, M., Parri, M., Cafardi,  
627 V., Bonomi, S., Ganfini, L., et al. (2017). Some Gram-negative lipoproteins keep their surface  
628 topology when transplanted from one species to another and deliver foreign polypeptides to the  
629 bacterial surface. *Mol. Cell. Proteomics* 16, 1348–1364.

630 Fluckiger, A., Daillère, R., Sassi, M., Sixt, B.S., Liu, P., Loos, F., Richard, C., Rabu, C., Alou,  
631 M.T., Goubet, A.G., et al. (2020). Cross-reactivity between tumor MHC class I-restricted antigens  
632 and an enterococcal bacteriophage. *Science*. 369, 936–942.

633 Geller, L.T., Barzily-Rokni, M., Danino, T., Jonas, O.H., Shental, N., Nejman, D., Gavert, N.,  
634 Zwang, Y., Cooper, Z.A., Shee, K., et al. (2017). Potential role of intratumor bacteria in mediating  
635 tumor resistance to the chemotherapeutic drug gemcitabine. *Science*. 357, 1156–1160.

636 Gil-Cruz, C., Perez-Shibayama, C., de Martin, A., Ronchi, F., van der Borght, K., Niederer, R.,  
637 Onder, L., Lütge, M., Novkovic, M., Nindl, V., et al. (2019). Microbiota-derived peptide mimics  
638 drive lethal inflammatory cardiomyopathy. *Science*. 366, 881–886.

639 Grandi, A., Tomasi, M., Zanella, I., Ganfini, L., Caproni, E., Fantappiè, L., Irene, C., Frattini, L.,  
640 Isaac, S.J., König, E., et al. (2017). Synergistic protective activity of tumor-specific epitopes  
641 engineered in bacterial Outer Membrane Vesicles. *Front. Oncol.* 7, 1–12.

642 Grandi, A., Fantappiè, L., Irene, C., Valensin, S., Tomasi, M., Stupia, S., Corbellari, R., Caproni,

643 E., Zanella, I., Isaac, S.J., et al. (2018). Vaccination with a FAT1-derived B cell epitope combined  
644 with tumor-specific B and T cell epitopes elicits additive protection in cancer mouse models. *Front.*  
645 *Oncol.* 8, 481.

646 Hieken, T.J., Chen, J., Hoskin, T.L., Walther-Antonio, M., Johnson, S., Ramaker, S., Xiao, J.,  
647 Radisky, D.C., Knutson, K.L., Kalari, K.R., et al. (2016). The microbiome of aseptically collected  
648 human breast tissue in benign and malignant disease. *Sci. Rep.* 6, 30751.

649 Huang, A.Y.C., Gulden, P.H., Woods, A.S., Thomas, M.C., Tong, C.D., Wang, W., Engelhard,  
650 V.H., Pasternack, G., Cotter, R., Hunt, D., et al. (1996). The immunodominant major  
651 histocompatibility complex class I-restricted antigen of a murine colon tumor derives from an  
652 endogenous retroviral gene product. *Proc. Natl. Acad. Sci. U. S. A.* 93, 9730–9735.

653 Huang, H., Wang, C., Rubelt, F., Scriba, T.J., and Davis, M.M. (2020). Analyzing the  
654 *Mycobacterium tuberculosis* immune response by T-cell receptor clustering with GLIPH2 and  
655 genome-wide antigen screening. *Nat. Biotechnol.* 38, 1194–1202.

656 Irene, C., Fantappiè, L., Caproni, E., Zerbini, F., Anesi, A., Tomasi, M., Zanella, I., Stupia, S.,  
657 Prete, S., Valensin, S., et al. (2019). Bacterial outer membrane vesicles engineered with lipidated  
658 antigens as a platform for *Staphylococcus aureus* vaccine. *Proc. Natl. Acad. Sci. U. S. A.* 116,  
659 21780–21788.

660 Jin, C., Lagoudas, G.K., Zhao, C., Blainey, P.C., Fox, J.G., Jacks, T., Jin, C., Lagoudas, G.K.,  
661 Zhao, C., Bullman, S., et al. (2019). Commensal microbiota promote lung cancer development via  
662 gd T cells. *Cell* 176, 998–1013.

663 Jones, E.J., Booth, C., Fonseca, S., Parker, A., Cross, K., Miquel-Clopés, A., Hautefort, I., Mayer,  
664 U., Wileman, T., Stentz, R., et al. (2020). The uptake, trafficking, and biodistribution of  
665 *Bacteroides thetaiotaomicron* generated Outer Membrane Vesicles. *Front. Microbiol.* 11, 57.

666 Kalaora, S., Nagler, A., Nejman, D., Alon, M., Barbolin, C., Barnea, E., Ketelaars, S.L.C., Cheng,  
667 K., Vervier, K., Shental, N., et al. (2021). Identification of bacteria-derived HLA-bound peptides  
668 in melanoma. *Nature* 592, 138–143.

669 Klock, H.E., and Lesley, S.A. (2009). The Polymerase Incomplete Primer Extension (PIPE)  
670 method applied to high-throughput cloning and site-directed mutagenesis. *Methods Mol. Biol.*  
671 498, 91–103.

672 Kulp, A., and Kuehn, M.J. (2010). Biological functions and biogenesis of secreted bacterial outer  
673 membrane vesicles. *Annu. Rev. Microbiol.* 64, 163–184.

674 Langmead, B., and Salzberg, S.L. (2012). Fast gapped-read alignment with Bowtie 2. *Nat.*  
675 *Methods* *9*, 357–359.

676 Lasaro, M., Liu, Z., Bishar, R., Kelly, K., Chattopadhyay, S., Paul, S., Sokurenko, E., Zhu, J., and  
677 Goulian, M. (2014). *Escherichia coli* isolate for studying colonization of the mouse intestine and  
678 its application to two-component signaling knockouts. *J. Bacteriol.* *196*, 1723–1732.

679 Li, G.W., Burkhardt, D., Gross, C., and Weissman, J.S. (2014). Quantifying absolute protein  
680 synthesis rates reveals principles underlying allocation of cellular resources. *Cell* *157*, 624–635.

681 Mylin, L.M., Schell, T.D., Roberts, D., Epler, M., Boesteanu, A., Collins, E.J., Frelinger, J.A.,  
682 Joyce, S., and Tevethia, S.S. (2000). Quantitation of CD8+ T-lymphocyte responses to multiple  
683 epitopes from Simian virus 40 (SV40) large T antigen in C57BL/6 mice immunized with SV40,  
684 SV40 T-antigen-transformed cells, or Vaccinia virus recombinants expressing full-length T  
685 antigen or epitope. *J. Virol.* *74*, 6922–6934.

686 Nejman, D., Livyatan, I., Fuks, G., Gavert, N., Zwang, Y., Geller, L.T., Rotter-Maskowitz, A.,  
687 Weiser, R., Mallel, G., Gigi, E., et al. (2020). The human tumor microbiome is composed of tumor  
688 type-specific intracellular bacteria. *Science.* *368*, 973–980.

689 Park, K.S., Lee, J., Lee, C., Park, H.T., Kim, J.W., Kim, O.Y., Kim, S.R., Rådinger, M., Jung,  
690 H.Y., Park, J., et al. (2018). Sepsis-like systemic inflammation induced by nano-sized extracellular  
691 vesicles from feces. *Front. Microbiol.* *9*, 1735.

692 Perez-Muñoz, M.E., Joglekar, P., Shen, Y.J., Chang, K.Y., and Peterson, D.A. (2015).  
693 Identification and phylogeny of the first T cell epitope identified from a human gut bacteroides  
694 species. *PLoS One* *10*, e0144382.

695 Pietrocola, F., Pol, J., Vacchelli, E., Rao, S., Enot, D.P., Baracco, E.E., Levesque, S., Castoldi, F.,  
696 Jacquelot, N., Yamazaki, T., et al. (2016). Caloric restriction mimetics enhance anticancer  
697 immunosurveillance. *Cancer Cell* *30*, 147–160.

698 Pro, S.C., Lindestam Arlehamn, C.S., Dhanda, S.K., Carpenter, C., Lindvall, M., Faruqi, A.A.,  
699 Santee, C.A., Renz, H., Sidney, J., Peters, B., et al. (2018). Microbiota epitope similarity either  
700 dampens or enhances the immunogenicity of disease-associated antigenic epitopes. *PLoS One* *13*,  
701 e0196551.

702 Pushalkar, S., Hundeyin, M., Daley, D., Zambirinis, C.P., Kurz, E., Mishra, A., Mohan, N., Aykut,  
703 B., Usyk, M., Torres, L.E., et al. (2018). The pancreatic cancer microbiome promotes oncogenesis  
704 by induction of innate and adaptive immune suppression. *Cancer Discov.* *8*, 403–416.



705 Qi, L.S., Larson, M.H., Gilbert, L.A., Doudna, J.A., Weissman, J.S., Arkin, A.P., and Lim, W.A.  
706 (2013). Repurposing CRISPR as an RNA-guided platform for sequence-specific control of gene  
707 expression. *Cell* 152, 1173–1183.

708 Rong, Y., Dong, Z., Hong, Z., Jin, Y., Zhang, W., Zhang, B., Mao, W., Kong, H., Wang, C., Yang,  
709 B., et al. (2017). Reactivity toward *Bifidobacterium longum* and *Enterococcus hirae* demonstrate  
710 robust CD8<sup>+</sup> T cell response and better prognosis in HBV-related hepatocellular carcinoma. *Exp.*  
711 *Cell Res.* 358, 352–359.

712 Rosenberg, E., Sharon, G., and Zilber-Rosenberg, I. (2009). The hologenome theory of evolution  
713 contains Lamarckian aspects within a Darwinian framework. *Environ. Microbiol.* 11.

714 Routy, B., Gopalakrishnan, V., Daillère, R., Zitvogel, L., Wargo, J.A., and Kroemer, G. (2018a).  
715 The gut microbiota influences anticancer immunosurveillance and general health. *Nat. Rev. Clin.*  
716 *Oncol.* 15, 382–396.

717 Routy, B., Chatelier, E. Le, Derosa, L., Duong, C.P.M., Alou, M.T., Daillère, R., Fluckiger, A.,  
718 Messaoudene, M., Rauber, C., Roberti, M.P., et al. (2018b). Gut microbiome influences efficacy  
719 of PD-1–based immunotherapy against epithelial tumors. *Science.* 359, 91–97.

720 Rubio-Godoy, V., Dutoit, V., Zhao, Y., Simon, R., Guillaume, P., Houghten, R., Romero, P.,  
721 Cerottini, J.-C., Pinilla, C., and Valmori, D. (2002). Positional scanning-synthetic peptide library-  
722 based analysis of self- and pathogen-derived peptide cross-reactivity with tumor-reactive melan-  
723 A-specific CTL. *J. Immunol.* 169, 5696–5707.

724 Shen, Y., Torchia, M.L.G., Lawson, G.W., Karp, C.L., Ashwell, J.D., and Mazmanian, S.K.  
725 (2012). Outer membrane vesicles of a human commensal mediate immune regulation and disease  
726 protection. *Cell Host Microbe* 12, 509–520.

727 Silva-Valenzuela, C.A., Desai, P.T., Molina-Quiroz, R.C., Pezoa, D., Zhang, Y., Porwollik, S.,  
728 Zhao, M., Hoffman, R.M., Contreras, I., Santiviago, C.A., et al. (2016). Solid tumors provide  
729 niche-specific conditions that lead to preferential growth of *Salmonella*. *Oncotarget* 7, 35169–  
730 35180.

731 Sivan, A., Corrales, L., Hubert, N., Williams, J.B., Aquino-Michaels, K., Earley, Z.M., Benyamin,  
732 F.W., Lei, Y.M., Jabri, B., Alegre, M.L., et al. (2015). Commensal *Bifidobacterium* promotes  
733 antitumor immunity and facilitates anti-PD-L1 efficacy. *Science.* 350, 1084–1089.

734 Sonnenborn, U. (2016). *Escherichia coli* strain Nissle 1917—from bench to bedside and back:  
735 History of a special *Escherichia coli* strain with probiotic properties. *FEMS Microbiol. Lett.* 363,

736 fnw212.

737 Tanoue, T., Morita, S., Plichta, D.R., Skelly, A.N., Suda, W., Sugiura, Y., Narushima, S.,  
738 Vlamakis, H., Motoo, I., Sugita, K., et al. (2019). A defined commensal consortium elicits CD8 T  
739 cells and anti-cancer immunity. *Nature* 565, 600–605.

740 Tulkens, J., Vergauwen, G., Van Deun, J., Geeurickx, E., Dhondt, B., Lippens, L., De Scheerder,  
741 M.A., Miinalainen, I., Rappu, P., De Geest, B.G., et al. (2020). Increased levels of systemic LPS-  
742 positive bacterial extracellular vesicles in patients with intestinal barrier dysfunction. *Gut* 69, 191–  
743 193.

744 Vétizou, M., Pitt, J.M., Daillère, R., Lepage, P., Waldschmitt, N., Flament, C., Rusakiewicz, S.,  
745 Routy, B., Roberti, M.P., Duong, C.P.M., et al. (2015). Anticancer immunotherapy by CTLA-4  
746 blockade relies on the gut microbiota. *Science*. 350, 1079–1084.

747 Vujanovic, L., Mandic, M., Olson, W.C., Kirkwood, J., and Storkus, W.J. (2007). A mycoplasma  
748 peptide elicits heteroclitic CD4+ T cell responses against tumor antigen MAGE-A6. *Clin. Cancer*  
749 *Res.* 13, 6796–6806.

750 Yang, Y., Torchinsky, M.B., Gobert, M., Xiong, H., Xu, M., Linehan, J.L., Alonzo, F., Ng, C.,  
751 Chen, A., Lin, X., et al. (2014). Focused specificity of intestinal TH17 cells towards commensal  
752 bacterial antigens. *Nature* 510, 152–156.

753 Zanella, I., König, E., Tomasi, M., Gagliardi, A., Frattini, L., Fantappiè, L., Irene, C., Zerbini, F.,  
754 Caproni, E., Isaac, S.J., et al. (2021). Proteome-minimized outer membrane vesicles from  
755 *Escherichia coli* as a generalized vaccine platform. *J. Extracell. Vesicles* 10, e12066.

756 Zerbini, F., Zanella, I., Fraccascia, D., König, E., Irene, C., Frattini, L.F., Tomasi, M., Fantappiè,  
757 L., Ganfini, L., Caproni, E., et al. (2017). Large scale validation of an efficient CRISPR/Cas-based  
758 multi gene editing protocol in *Escherichia coli*. *Microb. Cell Fact.* 16, 1–18.

759 Zitvogel, L., Ayyoub, M., Routy, B., and Kroemer, G. (2016). Microbiome and anticancer  
760 immunosurveillance. *Cell* 165, 276–287.

761 Zitvogel, L., Ma, Y., Raoult, D., Kroemer, G., and Gajewski, T.F. (2018). The microbiome in  
762 cancer immunotherapy: Diagnostic tools and therapeutic strategies. *Science*. 359, 1366–1370.

763 **Acknowledgements:** We want to thank Cristian Capasso and Prof. Vincenzo Cerullo from the  
764 Laboratory of Immunovirotherapy (University of Helsinki) for kindly providing the OVA-B16F10  
765 cell line. Furthermore, we gratefully thank Simona Tavarini and Chiara Sannicelli (Flow  
766 cytometry facility, GSK Siena, Italy) for flow cytometry acquisition and data analysis. We also  
767 highly appreciate the technical support of Carolina Fazio (CIO Preclinical Laboratories, TLS  
768 Siena, Italy) in *lamina propria* and tumor sample preparation and Daniela Fignani and Noemi  
769 Brusco (Fondazione Umberto Di Mario, Siena, Italy) for the technical support in IHC analysis.

770

771 **Funding:** This work has been financially supported by the Advanced European Research Council  
772 grant VACCIBIOME 834634 assigned to G.G.

773

774 **Author contributions:** G.G. development of the overall concept, design of the research and  
775 writing of the manuscript. A.Gr. coordination of experimental activities. M.B., S.G., L.F.  
776 engineering bacteria with OVA epitope. A.Gr.; A.G., E.C., L.F. OMVs engineering with SV40  
777 and AH1 epitopes. M.T., E.C., M.B., A.Gr., S.G., E.K. bacteria and OMVs preparations for oral  
778 administrations. E.C., A.Gr. S.T. T cell analysis in *lamina propria* and tumors. M.T., A.Gr., E.C.,  
779 I.Z., E.K, L.C., S.V., E.B. animal experiments and tumor challenge models. G.L., E.C, G.S., A.Gr.  
780 immunohistochemistry experiments and imaging analysis. F.D. coordination of  
781 immunohistochemistry analysis. E.C., M.B., I.Z. DNA extraction for WGS analysis. N.S.  
782 management of microbiome and sequencing analysis, F.A. libraries preparation for WGS, M.D.  
783 WGS bioinformatics analysis. E.C., A.Gr. RNA extraction from CD8 T cell populations of *lamina*  
784 *propria* and tumors. E.R. TCR sequencing and data analysis. E.K., I.Z., M.B., S.G. figures editing.  
785 All: critical reading of the manuscript.

786

787 **Competing interests:** G.G., L.F., are coinventors of a patent on OMVs; A.Gr. and G.G. are  
788 involved in a biotech company interested in exploiting the OMV platform.

789

790

791 **Figures and figure legends:**

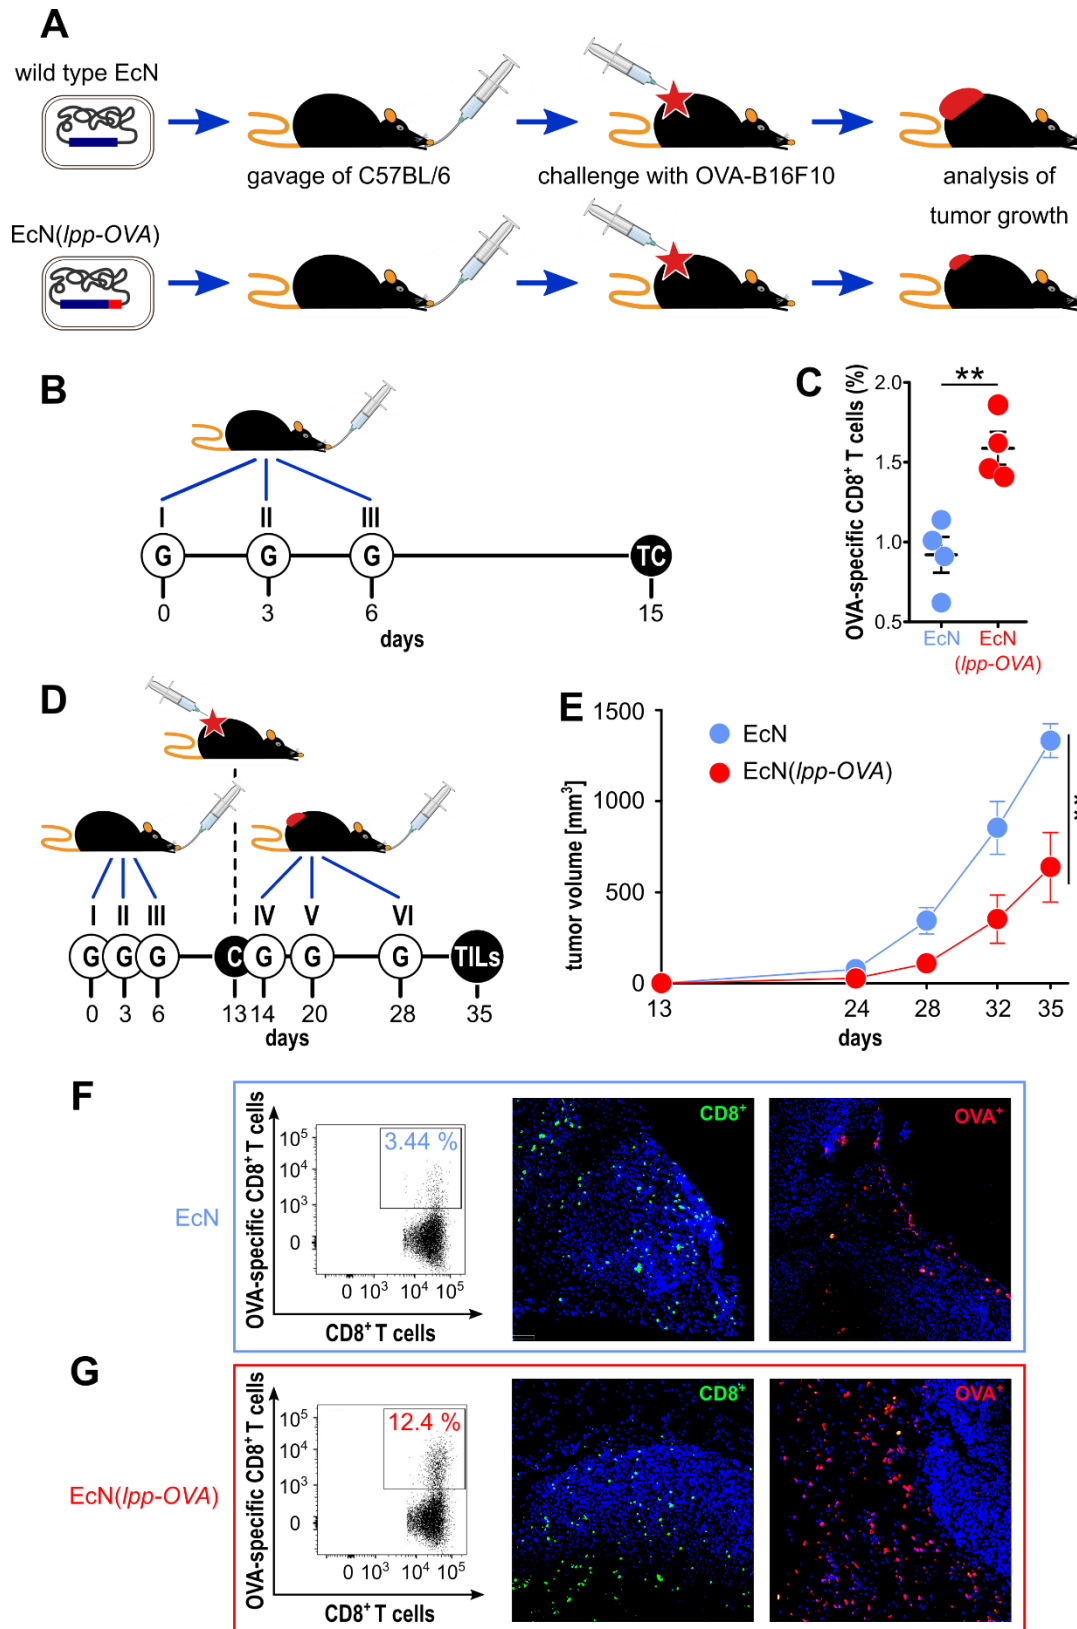

792

793 **Figure 1. Testing the role of molecular mimicry in tumor inhibition by oral administration**  
794 **of engineered probiotic bacteria.** (A) *Schematic representation of the experimental strategy used*  
795 *to support the role of “molecular mimicry” in tumor inhibition. E. coli Nissle was engineered with*  
796 *the OVA CD8<sup>+</sup> T cell epitope and the strain, or w.t. E. coli Nissle, were given to C57BL/6 mice*  
797 *by oral gavage. Animals were subsequently challenged with OVA-B16F10 cells and tumor growth*  
798 *was followed over time.* (B) *Experimental setup for the analysis of OVA-specific T cells in the*  
799 *lamina propria.* 10<sup>9</sup> CFU of EcN and EcN(*lpp-OVA*) were given to C57BL/6 mice three times at  
800 three day intervals by gavage (“G”). One week after the last gavage, T cells (“TC”) were isolated  
801 from the *lamina propria* and OVA-specific CD8<sup>+</sup> T cells were analyzed by flow cytometry. (C)  
802 *Flow cytometry analysis of OVA-specific CD8<sup>+</sup> T cells in lamina propria* – 1.5x10<sup>6</sup> cells were  
803 extracted from the *lamina propria* of C57BL/6 mice treated with EcN (blue) and EcN(*lpp-OVA*)  
804 (red) as described in (B). The frequency of OVA-specific CD8<sup>+</sup> T cells was measured by using  
805 OVA<sub>257-264</sub> Dextramer-PE. (D) *Experimental setup to test tumor inhibition of by oral*  
806 *administration of EcN(lpp-OVA).* EcN and EcN(*lpp-OVA*) were given at three day intervals to  
807 C57BL/6 mice by oral gavage (“G”). One week after the third gavage, mice were challenged (“C”)  
808 with 2.8x10<sup>5</sup> OVA-B16F10 cells followed by three additional gavages. Tumor growth was  
809 followed over a period of 23 days and at the end of the experiment tumor infiltrating T cells (TILs)  
810 were analyzed. (E) *Analysis of tumor inhibition by EcN(lpp-OVA).* Animals were treated as  
811 depicted in D, and tumor volumes were measured over time. Animals were sacrificed when tumors  
812 reach a volume of 1.500 mm<sup>3</sup>. Statistical analysis was performed using Student’s t-test (two-tailed).  
813 \*\* P ≤ 0.01. (F-G) *Analysis of Tumor Infiltrating Lymphocytes (TILs) by flow cytometry and*  
814 *immunohistochemistry.* At the end of the experiment depicted in D, tumors were collected  
815 dissociated by enzymatic and mechanical treatment and OVA-specific CD8<sup>+</sup> T cells were analyzed  
816 by flow cytometry. The figure reports the analysis of OVA-specific CD8<sup>+</sup> T cells from one tumor  
817 from mice treated with EcN and EcN(*lpp-OVA*) (total CD8<sup>+</sup> T cells from EcN tumor = 9400/live  
818 cells; total CD8<sup>+</sup> T cells from EcN(*lpp-OVA*) tumor = 8200/live cells). In addition, tumors were  
819 fixed and frozen sections were analyzed for OVA-specific CD8<sup>+</sup> T cells detection using OVA<sub>257-</sub>  
820 <sub>264</sub> Dextramer labeled with phycoerythrin (red stained cells in panels F and G). Total CD8<sup>+</sup> T cells  
821 (green stained cells) were also visualized by fixing frozen sections in acetone followed by  
822 incubation with anti-mouse CD8 rat monoclonal antibody and goat anti-rat Alexa-Fluor 488  
823 conjugate antibody.

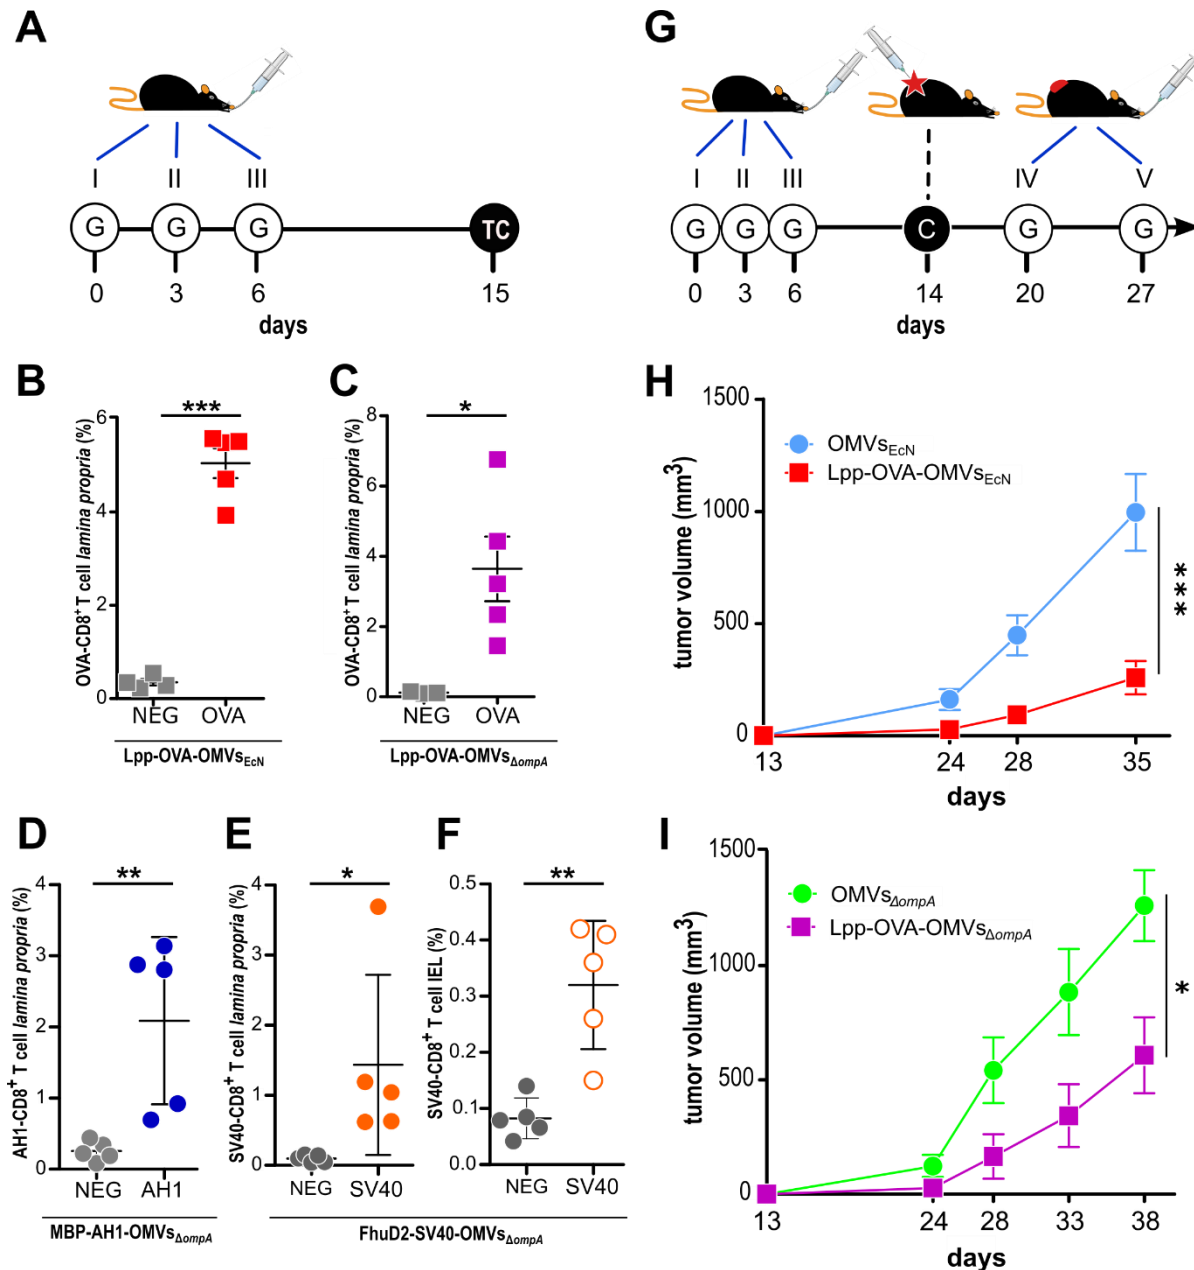

824

825 **Figure 2. Effect of oral administration of OMVs on anti-tumor responses.** (A) *Experimental*

826 *protocol to analyze CD8<sup>+</sup>T cell responses after administration of OMVs engineered with T cell*

827 *epitopes. C57BL/6 mice were given three times 10 μg OMVs decorated with selected CD8<sup>+</sup> T cell*

828 *epitopes. One week after the last gavage epitope-specific T cells (TC) from lamina propria*

829 *and/or intestinal epithelium (IEL) were analyzed by flow cytometry. (B-F) Flow cytometry*

830 *analysis of intestinal T cells. Animals were given OMVs engineered with specific tumor epitopes*

831 *as schematized in (A) and 1-2 x 10<sup>6</sup> cells were isolated from the lamina propria (B-E) and*

832 *intestinal epithelium (F) of the small intestine and the frequency of OVA-specific CD8<sup>+</sup> T cells*

833 was measured by using epitope-specific Dextramer-PE. As negative control, the unrelated  
834 dextramer SSYSYSSL was used. **(G)** *Experimental protocol to study the tumor inhibitory activity*  
835 *of OMVs*. Mice were given OMVs by oral gavage (G) and were subsequently challenged with  
836 OVA-B16F10 tumor cells. Tumor growth was monitored for 23 days and during this period two  
837 additional gavages were administered. **(H-I)** *Analysis of OMV-mediated tumor inhibition*.  
838 C57BL/6 mice were treated with OMVs from wild type and OVA-expressing EcN and E. coli  
839 BL21 $\Delta ompA$  as depicted in G and tumor volumes were measured over a period of 25 days.  
840 Statistical analysis was performed using Student's t-test (two-tailed). \*  $P \leq 0.05$ ; \*\*  $P \leq 0.01$ ; \*\*\*  
841  $P \leq 0.001$ .

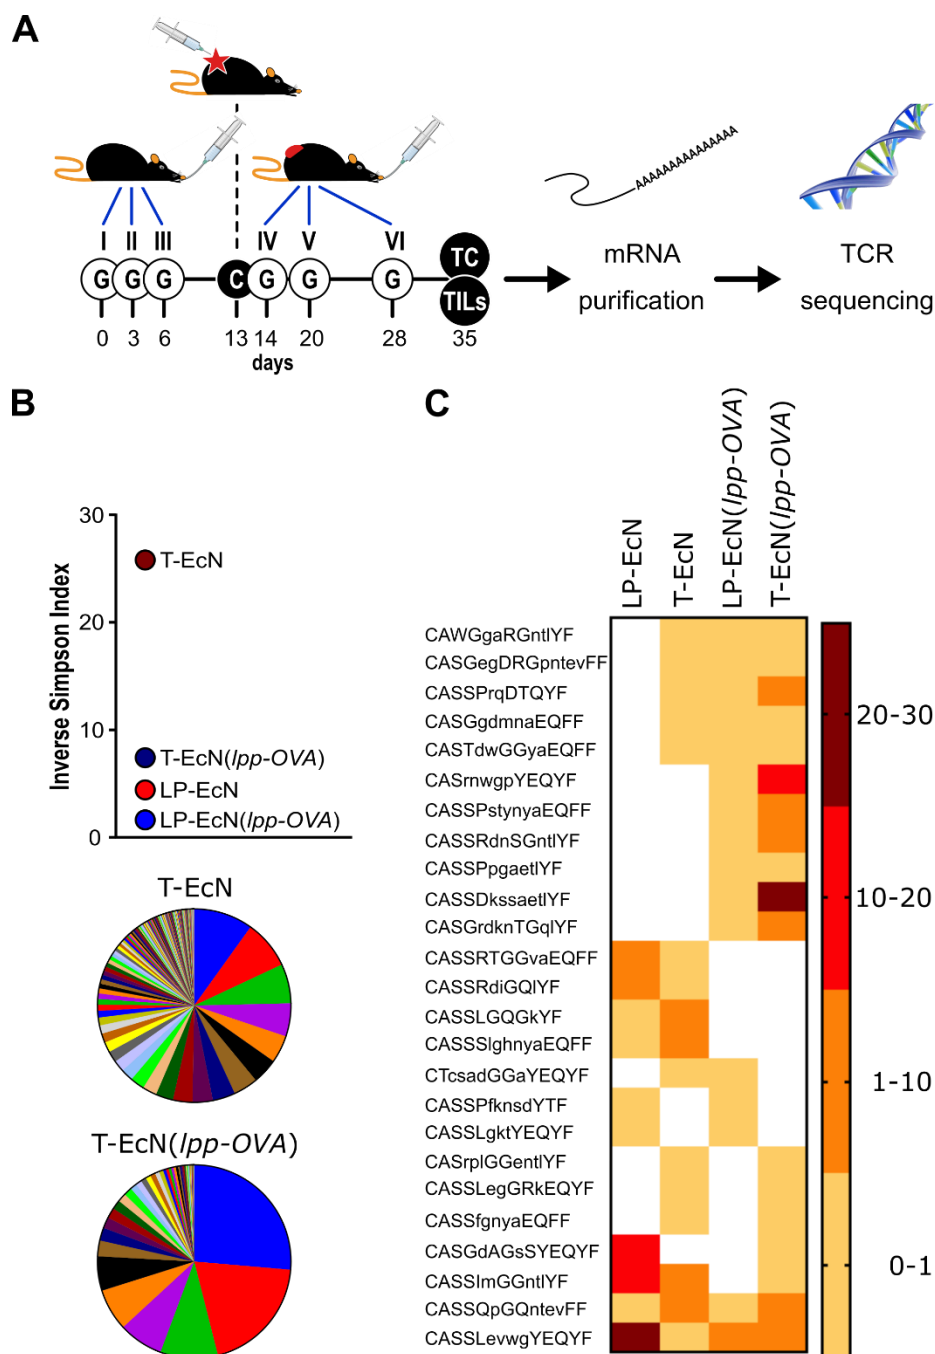

842  
 843 **Figure 3. Analysis of TCR sequencing of CD8<sup>+</sup> T cells from lamina propria and tumors. (A)**  
 844 Schematic representation of the experimental protocol. Mice (5 animals/group) were treated as  
 845 depicted in Figure 3A and at the end of the experiment CD8<sup>+</sup> T cells were collected from the  
 846 *lamina propria* and tumor of each animal. After RNA extraction, the TCR  $\beta$  subunit was subjected  
 847 to sequence analysis. **(B)** Analysis of TCR  $\beta$  subunit diversity using the Inverse Simpson Index.  
 848 The analysis was carried out after pooling the TCR sequences of each group. The pie charts



849 illustrate the different clonotypes identified in the tumors from EcN-treated mice (T-EcN) and  
850 from EcN(*lpp-OVA*)-treated mice (T-EcN(*lpp-OVA*)). (C) Heat map showing the sharing of  
851 identical CDR3 amino acid sequences among different experimental groups. Color legend  
852 indicates the frequency of the clonotypes measured as relative sequence count. T: tumor; LP:  
853 *lamina propria*.

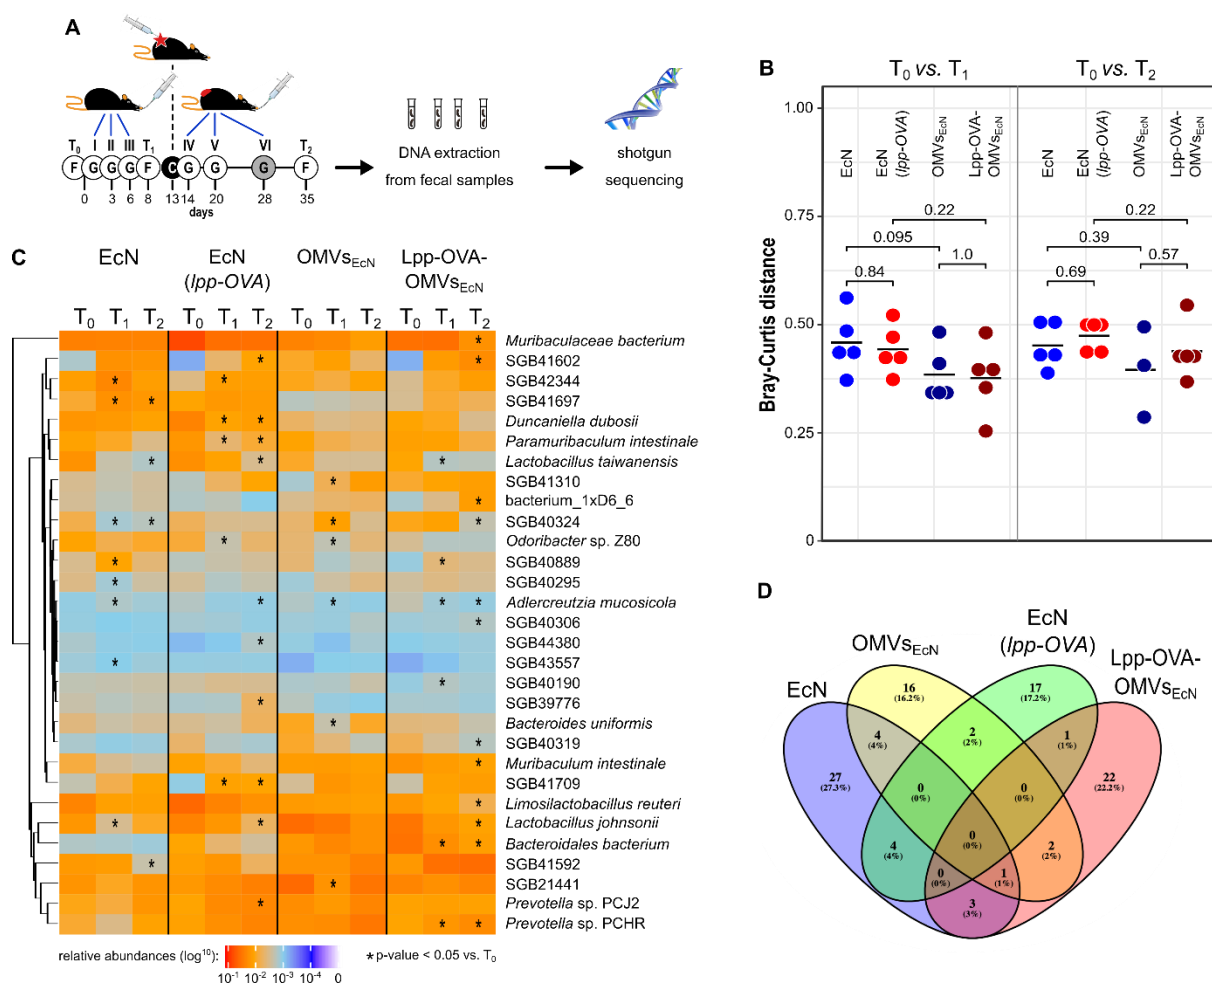

854  
 855 **Figure 4. Effect of EcN, EcN(*lpp-OVA*), OMVs<sub>EcN</sub> and Lpp-OVA-OMVs<sub>EcN</sub> oral**  
 856 **administration on gut microbiome composition.** (A) *Schematic representation of the*  
 857 *experimental procedure.* Mice were given three gavages (G) with either EcN, EcN(*lpp-OVA*),  
 858 OMVs<sub>EcN</sub> or Lpp-OVA-OMVs<sub>EcN</sub>. Mice were challenged with OVA-B16F10 cells (C) and then  
 859 they received two (in the case of OMVs) or three additional oral administrations. Fecal samples  
 860 were collected before the first gavage ( $T_0$ ), before the tumor challenge ( $T_1$ ) and at the end of the  
 861 experiment ( $T_2$ ) and fecal DNA was subjected to shotgun sequencing. (B) Microbiome diversity in  
 862 all mice within each treatment group at different time points ( $T_0$  vs.  $T_1$  and  $T_0$  vs.  $T_2$ ) estimated as  
 863 Bray-Curtis distance. Statistical differences between group pairs were calculated through  
 864 Wilcoxon Rank Sum Test. (C) Heatmap representing the relative abundance of the top 30 most  
 865 abundant bacterial species that showed statistical variation within each group at different time  
 866 points ( $T_0$  vs.  $T_1$  and  $T_0$  vs.  $T_2$ ) (\*  $P \leq 0.05$ ). (D) Venn diagram showing the overlap of species

867 with significant variations in relative abundance between  $T_0$  vs.  $T_1$  (Wilcoxon Rank Sum Test  $P \leq$   
868 0.05).

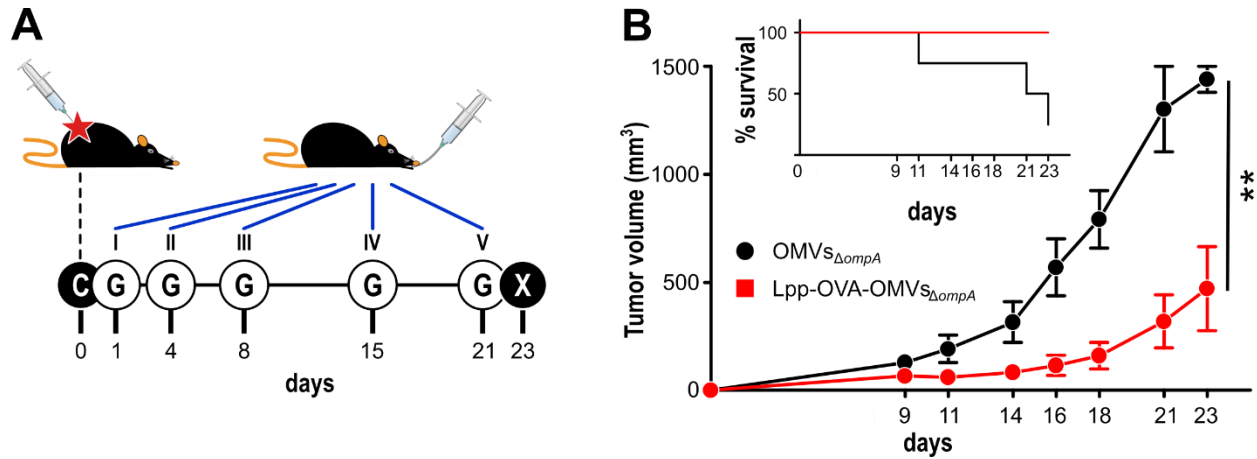

869

870 **Figure 5. Therapeutic effect of Lpp-OVA-OMVs<sub>ΔompA</sub>.** (A) *Schematic representation of the*  
871 *therapeutic experimental protocol.* C57BL/6 mice (5 animals/group) were challenged with OVA-  
872 B16F10 tumor cells and subsequently treated with five oral administrations (G) of either  
873 OMVs<sub>ΔompA</sub> or Lpp-OVA-OMVs<sub>ΔompA</sub> (10 μg/dose) over a period of 23 days. (B) *Analysis of tumor*  
874 *growth inhibition.* Tumor volumes were measured at three day intervals and the average of tumor  
875 volumes from each group is plotted over time. The graph in the inlet shows the survival curve of  
876 each group (according to the authorized protocol, animals were sacrificed when tumors reached a  
877 volume of 1.500 mm<sup>3</sup>). Statistical analysis was performed using Student's t-test (two-tailed). \*\* P  
878 ≤ 0.01.
